# Supplementary material
Source: PubMed Central journal article supplement (PMC3188388)
Supplement: NIHMS285531-supplement-1.pdf [file NIHMS285531-supplement-1.pdf]

## SUPPLEMENTARY FIGURE AND TABLE LEGENDS

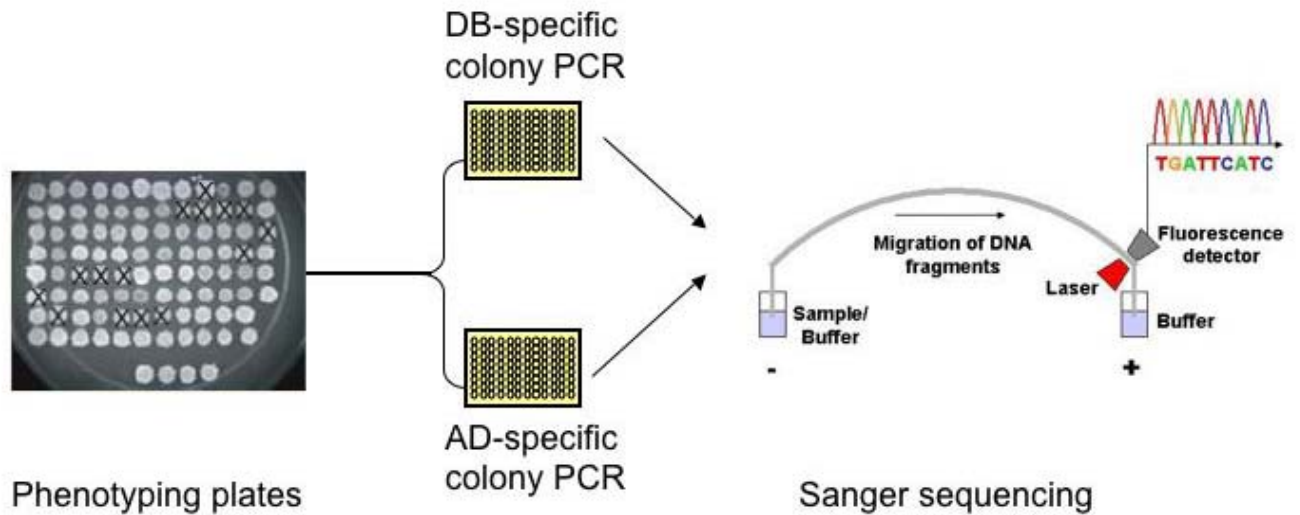

**Supplementary Figure 1.** The conventional approach for sequencing large numbers of ORF pairs resulting from high-throughput Y2H screens. Within the cells of each colony, there is a pair of DB-X and AD-Y ORFs that encode putatively-interacting proteins. X and Y ORFs are PCR amplified individually using DB- and AD-vector-specific primers, respectively, while keeping the association between them. Each ORF is then sequenced by Sanger sequencing.

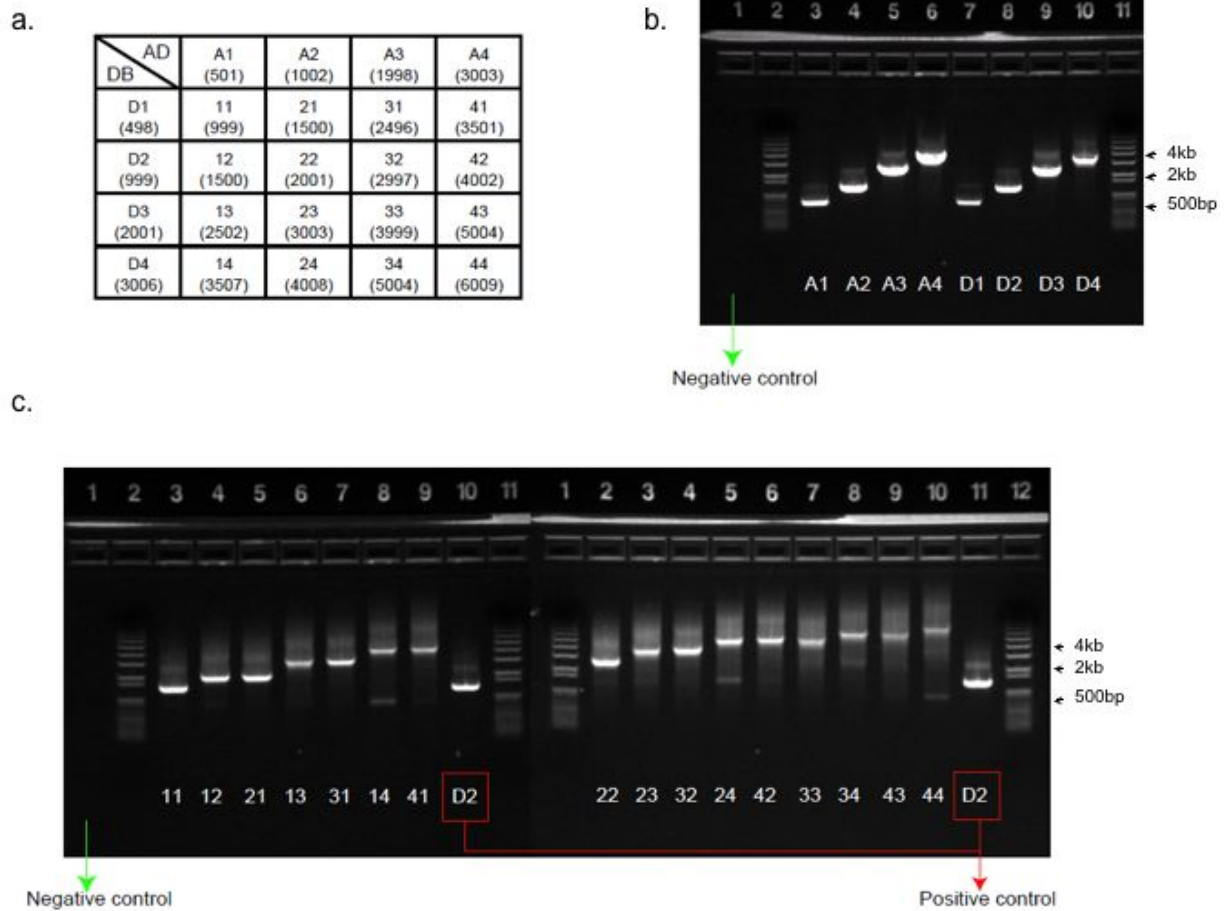

**Supplementary Figure 2.** Robust stitching PCR amplifications over a wide ORF size range. **(a)** Lengths of different ORFs selected for testing PCR stitching and expected lengths of the stitched PCR products. **(b)** PCR products of the selected ORFs from the first round PCR. **(c)** Conjugated PCR products from the second round PCR. The sizes of all PCR products are as expected.

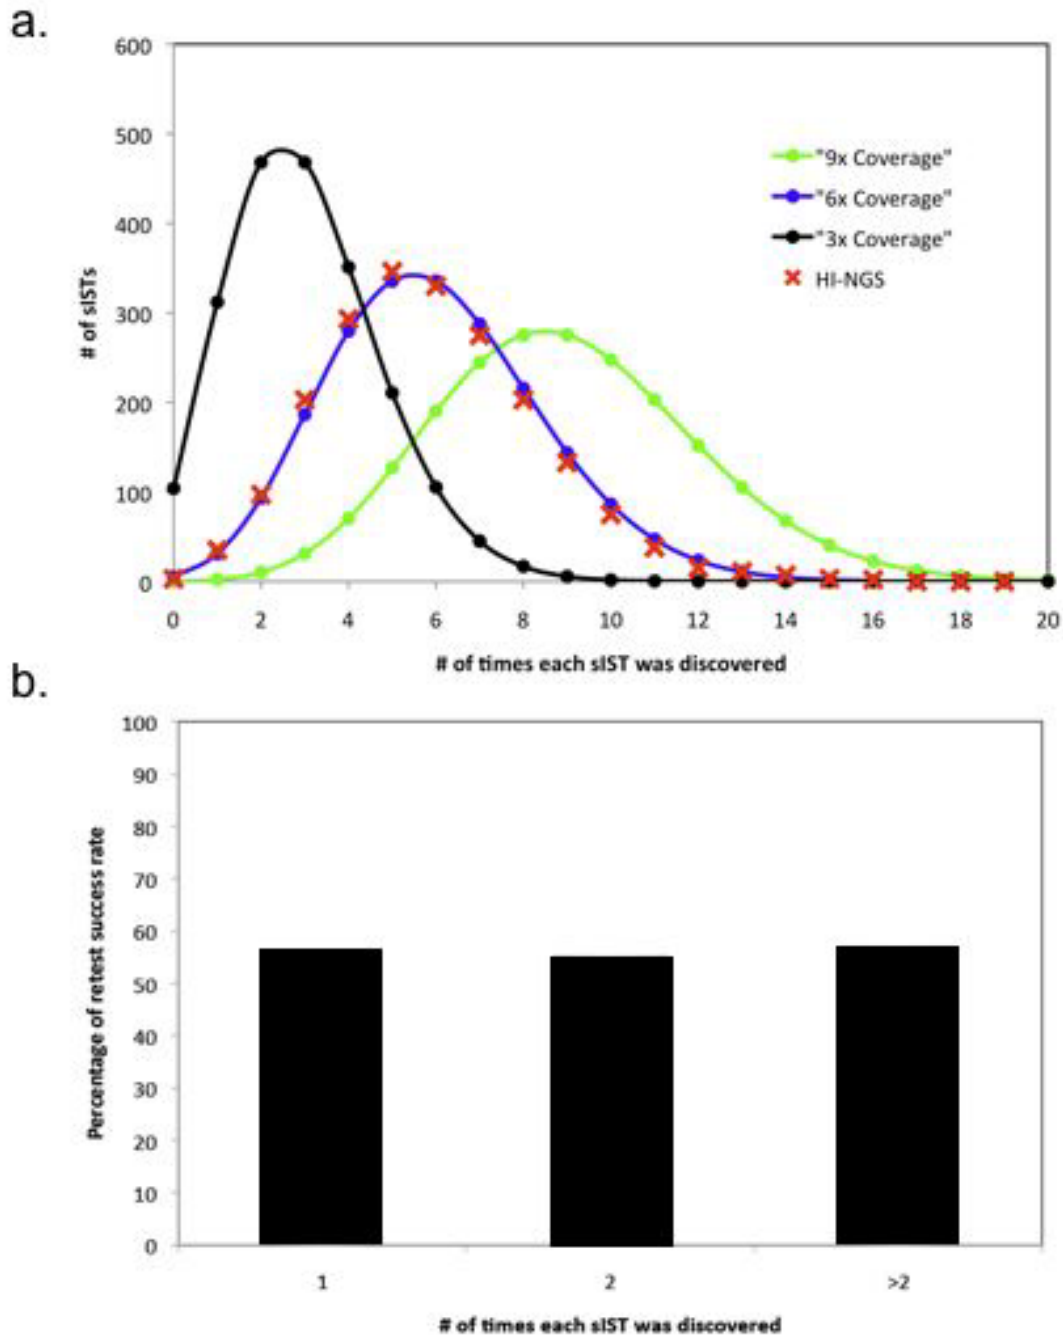

**Supplementary Figure 3.** Statistical analysis of the distribution of useful 454 reads for sISTs. **(a)** Poisson distributions of the number of reads for each sIST at different sequencing coverage. **(b)** Retest success rates for sISTs covered with one, two, or many (>2) sISTs are indistinguishable.

### **A. Traditional Sanger sequencing**

Failure rate of a single PCR  $\approx 5\%$

Failure rate of a single sequence run  $\approx 5\%$

Failure rate of two PCR and two sequence runs

$$= 1 - (1 - 5\%)^4$$

$$= 19\%$$

The overall success rate should be about 81%

### **B. 454 FLX sequencing**

Failure rate of a single PCR  $\approx 5\%$

Failure rate of three PCR =  $1 - (1 - 5\%)^3$

$$= 14\%$$

The overall success rate should be about 86%

**Therefore, the overlap should be about  $81\% \times 86\% = 70\%$**

**Supplementary Figure 4.** Statistical calculation of the overall success rate for PCR stitching with three PCR reactions for each pair of ORFs that encode interacting proteins.

a. Total proteins

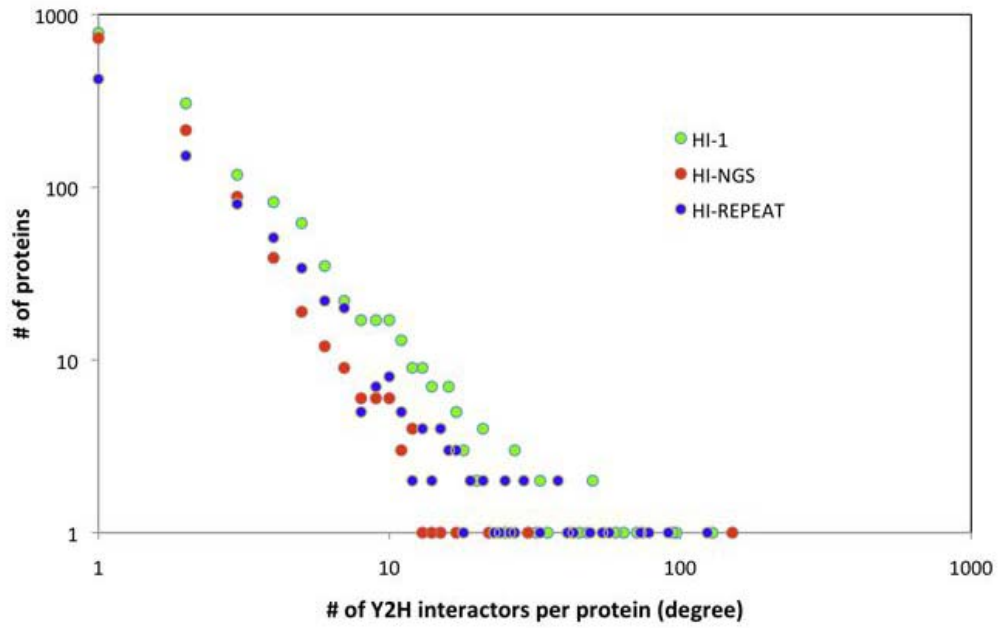

b. AD proteins

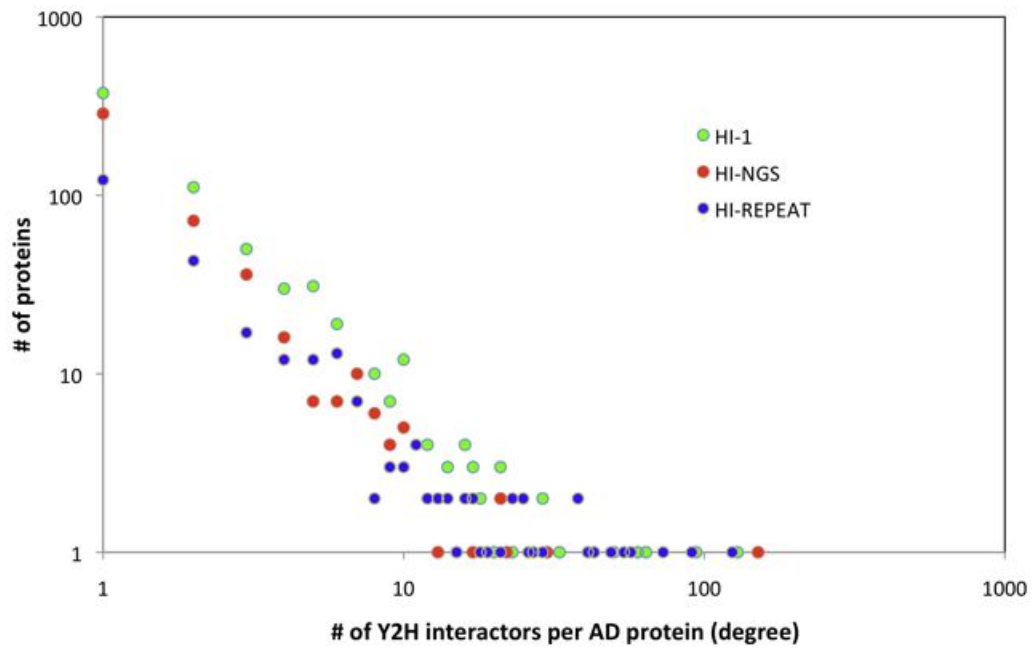

c. DB proteins

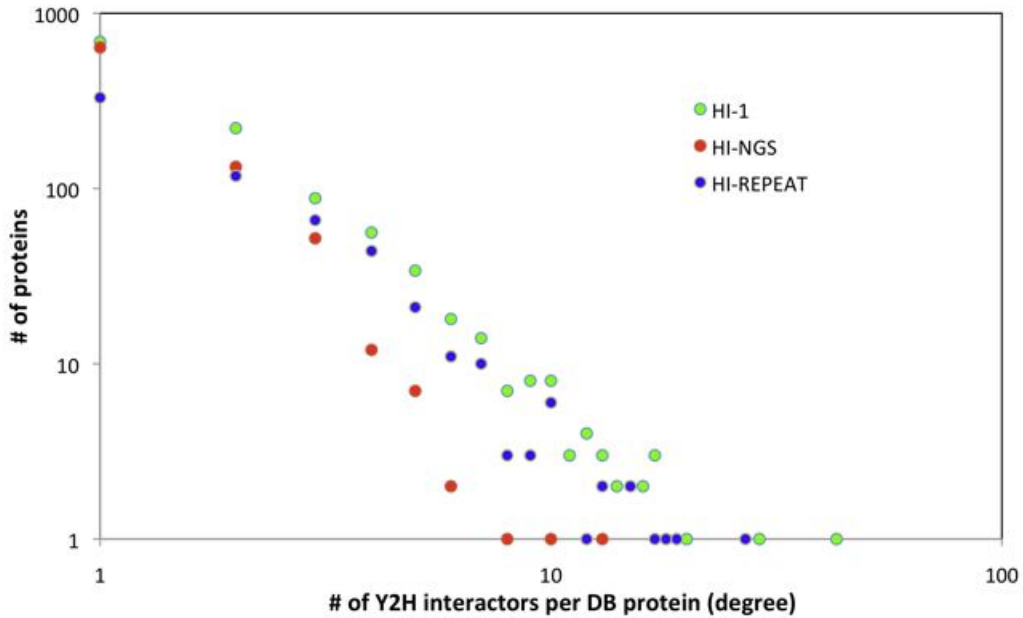

**Supplementary Figure 5.** Comparison of degree distributions of HI-NGS, HI1, and HI-REPEAT (unpublished data) datasets. **(a)** Degree distribution for all proteins. **(b)** Degree distribution for all AD proteins. **(c)** Degree distribution for all DB proteins. The scale-free degree distributions show that all three networks contain hubs. For instance, gene 11007 (CCDC85B) has 129 interactions in HI1, and gene 10488 (CREB3) has 124 interactions in HI-REPEAT. The degree distributions of HI-NGS (especially for total proteins and DBs) are the least extreme among the three networks.

a. Traditional PCR and Sanger sequencing

|                           | Unit Price   | Subtotal      |
|---------------------------|--------------|---------------|
| 2 PCR reactions           | \$1.00       | \$2.00        |
| 2 Sanger sequencing reads | \$3.00       | \$6.00        |
|                           | <b>Total</b> | <b>\$8.00</b> |

b. PCR stitching and 454 sequencing

|                     | Unit Price   | Subtotal      |
|---------------------|--------------|---------------|
| 3 PCR reactions     | \$1.00       | \$3.00        |
| \$8K for 5.2K pairs | \$1.50       | \$1.50        |
|                     | <b>Total</b> | <b>\$4.50</b> |

At current cost our new approach on average saves ~40% for each pair of interactions.

**Supplementary Figure 6.** Calculation and comparison of costs for each pair of ORFs that encode interacting proteins. **(a)** Traditional PCR and Sanger sequencing. **(b)** PCR stitching and 454 FLX sequencing.

**Supplementary Table 1.** PCR reaction mix setup and PCR conditions of the three PCR reactions for each pair of ORFs that encode interacting proteins. **(a)** Setup and conditions for first round DB- and AD-specific PCR reactions. **(b)** Setup and conditions for second round PCR reaction.

**a. First round of PCR stitching**

PCR reaction #1:

| Reagent                                  | Volume (ul) |
|------------------------------------------|-------------|
| 10x Buffer                               | 3           |
| 10 mM dNTP                               | 0.6         |
| 50 mM MgSO <sub>4</sub>                  | 1.2         |
| 10 uM AD-specific primer                 | 0.6         |
| 10 uM B2-linker-forward primer           | 0.6         |
| Invitrogen HiFi Platinum™ Taq polymerase | 0.12        |
| Yeast cell lysate                        | 3           |
| ddH <sub>2</sub> O                       | 20.88       |

PCR reaction #2:

| Reagent                                  | Volume (ul) |
|------------------------------------------|-------------|
| 10x Buffer                               | 3           |
| 10 mM dNTP                               | 0.6         |
| 50 mM MgSO <sub>4</sub>                  | 1.2         |
| 10 uM DB-specific primer                 | 0.6         |
| 10 uM B2-linker-reverse primer           | 0.6         |
| Invitrogen HiFi Platinum™ Taq polymerase | 0.12        |
| Yeast cell lysate                        | 3           |
| ddH <sub>2</sub> O                       | 20.88       |

PCR conditions:

| Temperature (°C) | Time (minute) | Cycle |
|------------------|---------------|-------|
| 94               | 2:00          | 1     |
| 94               | 0:45          | 35    |
| 58               | 0:30          |       |
| 68               | 5:00          |       |
| 68               | 5:00          | 1     |
| 10               | !             | 1     |



## b. Second round of PCR stitching

PCR reaction:

| Reagent                                     | Volume (ul) |
|---------------------------------------------|-------------|
| 10x Buffer                                  | 3           |
| 10 mM dNTP                                  | 0.6         |
| 50 mM MgSO <sub>4</sub>                     | 1.2         |
| 10 uM AD-specific primer                    | 0.6         |
| 10 uM DB-specific primer                    | 0.6         |
| Invitrogen HiFi Platinum™<br>Tag polymerase | 0.12        |
| Reaction #1                                 | 0.5         |
| Reaction #2                                 | 0.5         |
| ddH <sub>2</sub> O                          | 22.88       |

Primer sequences (5' → 3'):

AD:

CGCGTTTGAATCACTACAGGG

DB:

GGCTTCAGTGGAGACTGATATGCCTC

B2-linker-forward:

GGATACCGCCGAGCTGAGAGCCATCAAACCACTTTGTACAAGAAAGTTGGG

B2-linker-reverse:

CTCTCAGCTCGGCGGTATCCCCATCAAACCACTTTGTACAAGAAAGTTGGG

PCR conditions:

| Temperature (°C) | Time (minute) | Cycle |
|------------------|---------------|-------|
| 94               | 2:00          | 1     |
| 94               | 0:45          | 35    |
| 58               | 0:30          |       |
| 68               | 6:00          |       |
| 68               | 5:00          | 1     |
| 10               | !             | 1     |

**Supplementary Table 2.** 1166 interactions in HI-NGS. Entrez Gene IDs are used as gene identifiers.

| Interactions |           | Interactions |           | Interactions |           | Interactions |           |
|--------------|-----------|--------------|-----------|--------------|-----------|--------------|-----------|
| Protein A    | Protein B |
| 10016        | 553115    | 11043        | 80705     | 22929        | 7597      | 5082         | 5705      |
| 10024        | 22924     | 11043        | 80726     | 22929        | 91614     | 50848        | 6449      |
| 10048        | 55770     | 11043        | 81853     | 22932        | 9111      | 50855        | 5584      |
| 10048        | 595       | 11043        | 9747      | 22934        | 26003     | 5092         | 5092      |
| 10062        | 6258      | 11047        | 51377     | 22934        | 5781      | 5092         | 9513      |
| 10069        | 10320     | 1106         | 90933     | 22954        | 7356      | 51043        | 92856     |
| 10072        | 9817      | 11060        | 11100     | 22980        | 6303      | 51072        | 6867      |
| 10078        | 3839      | 11060        | 4088      | 23001        | 4188      | 51160        | 6293      |
| 10100        | 10488     | 11060        | 7456      | 23001        | 56658     | 51160        | 6498      |
| 10105        | 54971     | 11060        | 9260      | 23028        | 56658     | 51160        | 6606      |
| 10106        | 83461     | 11060        | 92714     | 23028        | 9111      | 51160        | 79720     |
| 10112        | 80256     | 11060        | 9618      | 23028        | 9189      | 51225        | 7454      |
| 10126        | 9457      | 11060        | 9871      | 23051        | 51701     | 51225        | 9818      |
| 10133        | 10318     | 11063        | 154313    | 23132        | 29883     | 51324        | 57085     |
| 10133        | 222484    | 11094        | 57146     | 23132        | 8887      | 51421        | 54927     |
| 10133        | 51019     | 11100        | 63948     | 23201        | 26039     | 51421        | 5892      |
| 10133        | 8697      | 11117        | 66036     | 23201        | 54461     | 51435        | 9144      |
| 10133        | 9413      | 11199        | 80153     | 23201        | 78990     | 5152         | 7023      |
| 10136        | 10488     | 11201        | 56658     | 23201        | 84959     | 51603        | 55145     |
| 10138        | 6015      | 1123         | 8440      | 23204        | 55204     | 51608        | 5565      |
| 10142        | 2239      | 11235        | 8428      | 23204        | 6642      | 51647        | 9391      |
| 10142        | 84970     | 11266        | 28227     | 23204        | 80221     | 51765        | 5987      |
| 10152        | 1838      | 11267        | 84313     | 23208        | 6449      | 51765        | 79959     |
| 10152        | 339834    | 11274        | 28978     | 23214        | 23636     | 5252         | 7024      |
| 10159        | 10488     | 11275        | 51060     | 23219        | 2801      | 5276         | 54557     |
| 10174        | 5062      | 11275        | 59349     | 23281        | 23281     | 5276         | 7917      |
| 1019         | 896       | 11277        | 51142     | 23281        | 293       | 5300         | 81628     |
| 10190        | 4105      | 112869       | 3866      | 23281        | 51164     | 53347        | 9802      |
| 10193        | 5984      | 11338        | 6626      | 23281        | 5682      | 5349         | 90993     |
| 10195        | 10488     | 11338        | 7307      | 23281        | 57088     | 5354         | 5798      |
| 10197        | 55840     | 11339        | 54069     | 23281        | 57474     | 53615        | 57459     |
| 10197        | 64798     | 11340        | 56915     | 23281        | 655       | 539          | 9240      |
| 10197        | 85403     | 11340        | 6628      | 23281        | 6687      | 54033        | 9802      |
| 1021         | 896       | 11345        | 8878      | 23281        | 7288      | 54107        | 54108     |
| 10212        | 84324     | 11043        | 7572      | 23281        | 7695      | 5413         | 79666     |
| 10228        | 63908     | 113675       | 113675    | 23281        | 79230     | 5432         | 54550     |
| 10228        | 6810      | 113878       | 121274    | 23281        | 79696     | 5441         | 8161      |
| 10241        | 11266     | 113878       | 23413     | 23281        | 83541     | 54458        | 84708     |
| 10241        | 153657    | 113878       | 26984     | 23281        | 84775     | 54461        | 6285      |

|       |        |  |        |        |  |        |        |  |        |       |
|-------|--------|--|--------|--------|--|--------|--------|--|--------|-------|
| 10241 | 167153 |  | 113878 | 51324  |  | 23281  | 85865  |  | 54472  | 54959 |
| 22929 | 55038  |  | 113878 | 54784  |  | 23281  | 8851   |  | 54550  | 79635 |
| 10241 | 3142   |  | 113878 | 56478  |  | 23281  | 90594  |  | 54550  | 83878 |
| 10241 | 51564  |  | 113878 | 5859   |  | 23281  | 9873   |  | 54550  | 84708 |
| 10241 | 5204   |  | 113878 | 7321   |  | 23283  | 2801   |  | 54557  | 5479  |
| 10241 | 55138  |  | 113878 | 7920   |  | 23321  | 80131  |  | 54623  | 9513  |
| 10241 | 553115 |  | 113878 | 83988  |  | 23338  | 84289  |  | 54793  | 54793 |
| 10241 | 8115   |  | 113878 | 85376  |  | 23387  | 7205   |  | 54797  | 56658 |
| 10241 | 84904  |  | 114822 | 80321  |  | 23392  | 57085  |  | 54927  | 64396 |
| 10241 | 9413   |  | 114904 | 6449   |  | 23424  | 4107   |  | 54954  | 7024  |
| 10241 | 9610   |  | 114928 | 154313 |  | 506    | 91647  |  | 54955  | 57541 |
| 10245 | 10488  |  | 114932 | 120379 |  | 23468  | 54904  |  | 54955  | 5987  |
| 10252 | 3198   |  | 114932 | 375341 |  | 23468  | 6672   |  | 54955  | 9189  |
| 10253 | 5013   |  | 114932 | 5296   |  | 23479  | 54550  |  | 54971  | 6668  |
| 10253 | 53347  |  | 114932 | 55234  |  | 23558  | 4103   |  | 54971  | 7148  |
| 10253 | 80270  |  | 114932 | 5682   |  | 23582  | 29088  |  | 54971  | 92399 |
| 10253 | 81853  |  | 114932 | 705    |  | 23582  | 496    |  | 54974  | 54974 |
| 10254 | 9413   |  | 114932 | 8099   |  | 23582  | 56906  |  | 5500   | 84988 |
| 1026  | 595    |  | 114971 | 4188   |  | 23582  | 5699   |  | 55012  | 80125 |
| 10262 | 2444   |  | 114971 | 8601   |  | 23582  | 57474  |  | 55034  | 55742 |
| 10262 | 9747   |  | 114984 | 51608  |  | 23582  | 6158   |  | 55037  | 79444 |
| 10289 | 1856   |  | 115106 | 23636  |  | 23582  | 7695   |  | 55086  | 79666 |
| 10301 | 57120  |  | 115106 | 51019  |  | 23582  | 84619  |  | 55093  | 55145 |
| 10302 | 9111   |  | 1153   | 3190   |  | 23582  | 90594  |  | 55138  | 9618  |
| 10318 | 29922  |  | 1158   | 140462 |  | 23582  | 9063   |  | 55145  | 55145 |
| 10318 | 29965  |  | 116113 | 9502   |  | 23635  | 5300   |  | 55145  | 7726  |
| 10318 | 55388  |  | 116173 | 148103 |  | 23636  | 284058 |  | 55165  | 7004  |
| 10318 | 6919   |  | 116173 | 2571   |  | 23636  | 51019  |  | 55211  | 6455  |
| 10318 | 7301   |  | 116173 | 3190   |  | 23636  | 51668  |  | 55211  | 79666 |
| 10318 | 79635  |  | 116173 | 51228  |  | 23636  | 53371  |  | 55216  | 6285  |
| 10318 | 81926  |  | 116173 | 5780   |  | 23636  | 55145  |  | 55216  | 7681  |
| 10318 | 900    |  | 116173 | 6642   |  | 23636  | 79635  |  | 55284  | 9051  |
| 1032  | 22806  |  | 116173 | 80221  |  | 23636  | 8473   |  | 5530   | 5534  |
| 1032  | 84970  |  | 116173 | 89882  |  | 23636  | 9818   |  | 553115 | 63948 |
| 10320 | 1488   |  | 116225 | 4665   |  | 23647  | 57085  |  | 55324  | 5987  |
| 10320 | 1641   |  | 116225 | 7126   |  | 23650  | 2801   |  | 55536  | 84619 |
| 10320 | 26240  |  | 116225 | 84445  |  | 23710  | 79036  |  | 5563   | 84456 |
| 10320 | 5892   |  | 1164   | 8548   |  | 24144  | 284058 |  | 55646  | 8575  |
| 10320 | 64396  |  | 116442 | 2801   |  | 24144  | 3603   |  | 5565   | 7186  |
| 10320 | 744    |  | 117144 | 8601   |  | 24144  | 54474  |  | 5565   | 80125 |
| 10320 | 80256  |  | 117177 | 81567  |  | 24144  | 64745  |  | 55663  | 7718  |
| 10342 | 9500   |  | 117177 | 8985   |  | 24144  | 84988  |  | 55663  | 84307 |
| 10362 | 7185   |  | 117178 | 23503  |  | 24144  | 9753   |  | 5571   | 8666  |
| 10385 | 10488  |  | 117178 | 58491  |  | 2444   | 663    |  | 55734  | 64782 |
| 10422 | 1856   |  | 117178 | 60491  |  | 245973 | 2801   |  | 55734  | 90933 |
| 10422 | 23321  |  | 117178 | 84619  |  | 246184 | 8881   |  | 55739  | 6449  |

|       |        |  |        |        |  |        |        |  |       |       |
|-------|--------|--|--------|--------|--|--------|--------|--|-------|-------|
| 10425 | 80125  |  | 117581 | 6938   |  | 246329 | 79169  |  | 55758 | 7186  |
| 10431 | 10488  |  | 118471 | 29979  |  | 246329 | 84080  |  | 55773 | 6794  |
| 10435 | 23092  |  | 118788 | 8440   |  | 246329 | 85403  |  | 5585  | 9454  |
| 10443 | 5478   |  | 1196   | 1198   |  | 2495   | 2512   |  | 55888 | 9753  |
| 10447 | 10488  |  | 1196   | 6733   |  | 253980 | 7126   |  | 55906 | 58500 |
| 10458 | 148223 |  | 1196   | 79753  |  | 254122 | 6642   |  | 55916 | 56000 |
| 10482 | 23636  |  | 120534 | 79666  |  | 2553   | 4004   |  | 5598  | 63940 |
| 10483 | 133619 |  | 121268 | 2275   |  | 2553   | 7186   |  | 56658 | 56658 |
| 10483 | 3200   |  | 121457 | 7170   |  | 256302 | 54507  |  | 56658 | 5715  |
| 10483 | 9871   |  | 121536 | 55145  |  | 2577   | 64395  |  | 56658 | 7321  |
| 10488 | 10488  |  | 122786 | 6938   |  | 2577   | 64396  |  | 56658 | 7325  |
| 10488 | 10490  |  | 124220 | 2801   |  | 25788  | 7341   |  | 56658 | 9129  |
| 10488 | 1066   |  | 124404 | 1731   |  | 25816  | 79666  |  | 5682  | 60490 |
| 10488 | 10668  |  | 124790 | 124790 |  | 25900  | 84260  |  | 5684  | 5684  |
| 10488 | 10695  |  | 124790 | 58500  |  | 25959  | 2801   |  | 5684  | 5687  |
| 10488 | 10948  |  | 124790 | 63978  |  | 25988  | 339834 |  | 56935 | 665   |
| 10488 | 10990  |  | 124790 | 6938   |  | 25988  | 56658  |  | 56952 | 81853 |
| 9513  | 9883   |  | 126070 | 23582  |  | 25988  | 7157   |  | 5701  | 5711  |
| 10488 | 11070  |  | 126070 | 4188   |  | 26003  | 5998   |  | 5705  | 7138  |
| 10488 | 11094  |  | 126070 | 7185   |  | 26003  | 64518  |  | 5706  | 5715  |
| 10488 | 11161  |  | 126308 | 7050   |  | 26003  | 79656  |  | 57085 | 5780  |
| 10488 | 113178 |  | 127557 | 6133   |  | 26003  | 91703  |  | 57085 | 7329  |
| 10488 | 113452 |  | 127557 | 9129   |  | 26036  | 55007  |  | 57085 | 8050  |
| 10488 | 114569 |  | 127557 | 92822  |  | 26036  | 55038  |  | 57085 | 81853 |
| 10488 | 116173 |  | 127703 | 23281  |  | 26036  | 7329   |  | 57085 | 84191 |
| 10488 | 1186   |  | 127703 | 7170   |  | 26039  | 6628   |  | 57088 | 81926 |
| 10488 | 125875 |  | 128977 | 79959  |  | 26151  | 9521   |  | 57088 | 8862  |
| 10488 | 133022 |  | 129807 | 4188   |  | 26228  | 30011  |  | 57088 | 9404  |
| 10488 | 145957 |  | 129807 | 7205   |  | 26234  | 6500   |  | 5709  | 81853 |
| 10488 | 1521   |  | 130502 | 29781  |  | 26273  | 6500   |  | 57326 | 64395 |
| 10488 | 1534   |  | 130502 | 4656   |  | 26353  | 9531   |  | 57456 | 79959 |
| 10488 | 192683 |  | 130540 | 6820   |  | 26508  | 4188   |  | 57506 | 7186  |
| 10488 | 200185 |  | 1329   | 339834 |  | 266740 | 9702   |  | 57559 | 5862  |
| 10488 | 2030   |  | 1329   | 373    |  | 26751  | 79720  |  | 57639 | 7185  |
| 10488 | 2224   |  | 1329   | 54906  |  | 26994  | 51619  |  | 57693 | 5940  |
| 10488 | 22845  |  | 134288 | 6449   |  | 27111  | 441519 |  | 57727 | 57727 |
| 10488 | 22908  |  | 139596 | 79912  |  | 27111  | 441521 |  | 57820 | 9852  |
| 10488 | 23471  |  | 14     | 55216  |  | 27111  | 51538  |  | 5805  | 5805  |
| 10488 | 23480  |  | 140688 | 1487   |  | 27111  | 55660  |  | 58155 | 9782  |
| 10488 | 25972  |  | 140691 | 4103   |  | 27111  | 84285  |  | 58500 | 7185  |
| 10488 | 27040  |  | 140691 | 516    |  | 27232  | 51564  |  | 58500 | 79666 |
| 10488 | 2706   |  | 140691 | 8434   |  | 27238  | 6455   |  | 58516 | 79959 |
| 10488 | 28978  |  | 140735 | 8631   |  | 27246  | 9802   |  | 58516 | 9111  |
| 10488 | 29058  |  | 1411   | 1414   |  | 27258  | 57819  |  | 5877  | 83593 |
| 10488 | 2993   |  | 142679 | 211    |  | 27300  | 5877   |  | 5886  | 7205  |
| 10488 | 3162   |  | 145282 | 4105   |  | 27316  | 3190   |  | 5914  | 6258  |

|       |        |  |        |        |  |        |        |  |       |       |
|-------|--------|--|--------|--------|--|--------|--------|--|-------|-------|
| 10488 | 3177   |  | 1457   | 54778  |  | 27335  | 51386  |  | 59286 | 5987  |
| 10488 | 336    |  | 145946 | 2275   |  | 27430  | 4144   |  | 5929  | 9070  |
| 10488 | 3386   |  | 145957 | 89885  |  | 2773   | 63940  |  | 5987  | 60491 |
| 10488 | 340481 |  | 1468   | 4188   |  | 2801   | 284058 |  | 5987  | 7286  |
| 10488 | 347    |  | 147687 | 22981  |  | 2801   | 285172 |  | 5987  | 79025 |
| 10488 | 358    |  | 147687 | 23582  |  | 2801   | 29087  |  | 5987  | 79696 |
| 10488 | 362    |  | 147687 | 24144  |  | 2801   | 3707   |  | 5987  | 81926 |
| 10488 | 3732   |  | 147687 | 5987   |  | 2801   | 51164  |  | 5987  | 8697  |
| 10488 | 375035 |  | 147687 | 80817  |  | 2801   | 58155  |  | 5987  | 8930  |
| 10488 | 3775   |  | 147700 | 147700 |  | 2801   | 6941   |  | 5987  | 9929  |
| 10488 | 394261 |  | 147700 | 285753 |  | 2801   | 79169  |  | 5990  | 84970 |
| 10488 | 441521 |  | 148581 | 2801   |  | 2801   | 8065   |  | 60    | 60    |
| 10488 | 4712   |  | 1488   | 7050   |  | 2801   | 81629  |  | 60    | 71    |
| 10488 | 4818   |  | 150483 | 22806  |  | 2801   | 81926  |  | 6015  | 7703  |
| 10488 | 50859  |  | 150771 | 6449   |  | 2801   | 84460  |  | 60490 | 60490 |
| 10488 | 51006  |  | 151194 | 63920  |  | 2801   | 84934  |  | 60490 | 7775  |
| 10488 | 51024  |  | 151871 | 2257   |  | 2801   | 84991  |  | 60491 | 9240  |
| 10488 | 51090  |  | 151871 | 84285  |  | 2801   | 8796   |  | 6271  | 6285  |
| 10488 | 51107  |  | 1522   | 3846   |  | 2801   | 902    |  | 6275  | 6285  |
| 10488 | 51128  |  | 152926 | 329    |  | 2801   | 9690   |  | 6285  | 84277 |
| 10488 | 51465  |  | 153657 | 4253   |  | 2801   | 9814   |  | 6285  | 84830 |
| 10488 | 51522  |  | 153743 | 5501   |  | 2815   | 3198   |  | 6285  | 92856 |
| 10488 | 51540  |  | 154313 | 27033  |  | 28227  | 81853  |  | 6293  | 79874 |
| 10488 | 51703  |  | 154313 | 84970  |  | 283385 | 4105   |  | 6293  | 9589  |
| 10488 | 51715  |  | 155465 | 23636  |  | 284001 | 9814   |  | 6303  | 84991 |
| 10488 | 527    |  | 155465 | 29979  |  | 284058 | 29911  |  | 6342  | 9319  |
| 10488 | 5349   |  | 159163 | 3190   |  | 284058 | 4188   |  | 638   | 89885 |
| 10488 | 53826  |  | 1602   | 55577  |  | 284252 | 7329   |  | 63948 | 84970 |
| 10488 | 5407   |  | 1602   | 79169  |  | 285622 | 64098  |  | 63978 | 79666 |
| 10488 | 54708  |  | 163081 | 51776  |  | 285753 | 51160  |  | 63978 | 91647 |
| 10488 | 54946  |  | 163183 | 64581  |  | 285753 | 55165  |  | 64210 | 9391  |
| 10488 | 54947  |  | 1641   | 2801   |  | 285753 | 84619  |  | 64395 | 64396 |
| 10488 | 55092  |  | 164592 | 23281  |  | 285782 | 8500   |  | 6442  | 6449  |
| 10488 | 55266  |  | 164592 | 27018  |  | 28956  | 8649   |  | 6449  | 6782  |
| 10488 | 55273  |  | 164592 | 7185   |  | 28985  | 8562   |  | 6449  | 79089 |
| 10488 | 55281  |  | 164592 | 80817  |  | 29124  | 9586   |  | 64581 | 665   |
| 10488 | 55332  |  | 167826 | 7185   |  | 2947   | 2947   |  | 64744 | 9802  |
| 10488 | 55716  |  | 170082 | 79596  |  | 2949   | 2949   |  | 64745 | 7205  |
| 10488 | 55850  |  | 170463 | 5300   |  | 29761  | 6850   |  | 64778 | 9319  |
| 10488 | 55851  |  | 170954 | 5987   |  | 29781  | 7186   |  | 64786 | 80254 |
| 10488 | 55973  |  | 1808   | 1808   |  | 29781  | 83538  |  | 64798 | 8945  |
| 10488 | 55974  |  | 1838   | 80254  |  | 29785  | 54507  |  | 64798 | 90933 |
| 10488 | 56063  |  | 1856   | 23623  |  | 29883  | 51435  |  | 64802 | 64802 |
| 10488 | 56475  |  | 1856   | 3104   |  | 29907  | 57142  |  | 64853 | 79666 |
| 10488 | 56894  |  | 1856   | 407    |  | 29907  | 92840  |  | 660   | 6774  |
| 10488 | 57515  |  | 1856   | 51720  |  | 29911  | 55554  |  | 6602  | 79720 |

|       |       |  |        |        |  |        |        |  |       |       |
|-------|-------|--|--------|--------|--|--------|--------|--|-------|-------|
| 10488 | 5780  |  | 1856   | 55110  |  | 29911  | 6839   |  | 66036 | 9107  |
| 10488 | 58515 |  | 1856   | 5562   |  | 29911  | 7170   |  | 6605  | 80254 |
| 10488 | 598   |  | 1856   | 64396  |  | 29911  | 84934  |  | 6606  | 6606  |
| 10488 | 6009  |  | 1856   | 7170   |  | 29911  | 92999  |  | 6606  | 9360  |
| 10488 | 60343 |  | 1856   | 7454   |  | 29922  | 8061   |  | 664   | 665   |
| 10488 | 6189  |  | 1856   | 7525   |  | 29922  | 84708  |  | 6642  | 92840 |
| 10488 | 6342  |  | 1856   | 79159  |  | 29959  | 81628  |  | 665   | 665   |
| 10488 | 638   |  | 1856   | 84619  |  | 29979  | 3537   |  | 6652  | 6652  |
| 10488 | 6472  |  | 1856   | 9531   |  | 29979  | 5276   |  | 6687  | 9240  |
| 10488 | 64755 |  | 1876   | 7029   |  | 29979  | 55742  |  | 6774  | 6850  |
| 10488 | 6515  |  | 191    | 79078  |  | 29979  | 60626  |  | 6810  | 79901 |
| 10488 | 664   |  | 1912   | 4004   |  | 29979  | 7857   |  | 6810  | 8417  |
| 10488 | 6890  |  | 1912   | 4005   |  | 29979  | 9240   |  | 6919  | 79036 |
| 10488 | 7102  |  | 1912   | 4733   |  | 29994  | 373    |  | 6921  | 6923  |
| 10488 | 7104  |  | 1912   | 6477   |  | 3091   | 6759   |  | 6926  | 79666 |
| 10488 | 7106  |  | 1912   | 705    |  | 9500   | 9802   |  | 7004  | 9659  |
| 10488 | 7780  |  | 1912   | 84078  |  | 5050   | 5050   |  | 705   | 7205  |
| 10488 | 78988 |  | 1912   | 84080  |  | 3104   | 90933  |  | 705   | 9618  |
| 10488 | 78992 |  | 1912   | 84456  |  | 3183   | 3183   |  | 7067  | 79959 |
| 10488 | 79001 |  | 1933   | 1937   |  | 3183   | 55285  |  | 71    | 71    |
| 10488 | 79152 |  | 1936   | 80325  |  | 3185   | 80125  |  | 7138  | 7168  |
| 10488 | 79157 |  | 1937   | 23276  |  | 3198   | 3198   |  | 7170  | 8379  |
| 10488 | 79161 |  | 196513 | 80153  |  | 3219   | 84445  |  | 7185  | 7189  |
| 10488 | 7920  |  | 1974   | 2801   |  | 329    | 7286   |  | 7185  | 81926 |
| 10488 | 79415 |  | 201181 | 55145  |  | 329    | 80705  |  | 7185  | 85302 |
| 10488 | 79669 |  | 201181 | 5684   |  | 329    | 81926  |  | 7185  | 90874 |
| 10488 | 79844 |  | 201255 | 79036  |  | 3329   | 84445  |  | 7186  | 7189  |
| 10488 | 79901 |  | 201895 | 89885  |  | 339047 | 79876  |  | 7186  | 79025 |
| 10488 | 80221 |  | 202559 | 202559 |  | 339834 | 84619  |  | 7186  | 91544 |
| 10488 | 80704 |  | 202559 | 7297   |  | 3434   | 3437   |  | 7186  | 92610 |
| 10488 | 80777 |  | 202559 | 81853  |  | 3437   | 7170   |  | 7188  | 7189  |
| 10488 | 81539 |  | 203068 | 222484 |  | 348487 | 51440  |  | 7188  | 9111  |
| 10488 | 81853 |  | 203068 | 266740 |  | 3603   | 7205   |  | 7189  | 79666 |
| 10488 | 81855 |  | 203068 | 29781  |  | 3608   | 5987   |  | 7205  | 7414  |
| 10488 | 8260  |  | 203228 | 8892   |  | 3611   | 55742  |  | 7205  | 9747  |
| 10488 | 83460 |  | 2071   | 2801   |  | 3612   | 3612   |  | 7286  | 7791  |
| 10488 | 84065 |  | 2079   | 54906  |  | 3646   | 93487  |  | 7314  | 9802  |
| 10488 | 84102 |  | 211    | 26073  |  | 373    | 389741 |  | 7325  | 9666  |
| 10488 | 8417  |  | 211    | 57634  |  | 373    | 5144   |  | 7329  | 84528 |
| 10488 | 84179 |  | 211    | 9168   |  | 373    | 7329   |  | 7329  | 9111  |
| 10488 | 84277 |  | 2130   | 311    |  | 374355 | 79666  |  | 7329  | 9319  |
| 10488 | 84329 |  | 2139   | 6495   |  | 3796   | 55132  |  | 7391  | 79666 |
| 10488 | 84620 |  | 2170   | 23636  |  | 3801   | 54955  |  | 7414  | 9404  |
| 10488 | 84830 |  | 220002 | 26     |  | 3801   | 5563   |  | 744   | 9319  |
| 10488 | 84975 |  | 220082 | 4292   |  | 3801   | 6605   |  | 7454  | 9322  |
| 10488 | 8611  |  | 220108 | 222389 |  | 3801   | 84619  |  | 7456  | 9454  |

|       |        |  |        |        |  |        |       |  |       |       |
|-------|--------|--|--------|--------|--|--------|-------|--|-------|-------|
| 10488 | 8760   |  | 220108 | 80125  |  | 3846   | 54778 |  | 7566  | 892   |
| 10488 | 8974   |  | 2202   | 6449   |  | 3846   | 59277 |  | 7572  | 90933 |
| 10488 | 91252  |  | 2203   | 2203   |  | 3846   | 6687  |  | 7681  | 84080 |
| 10488 | 9145   |  | 220766 | 220766 |  | 3846   | 7301  |  | 7791  | 84816 |
| 10488 | 91663  |  | 220766 | 90060  |  | 3846   | 81926 |  | 7812  | 83638 |
| 10488 | 91782  |  | 221184 | 5987   |  | 3846   | 84221 |  | 78992 | 89885 |
| 10488 | 931    |  | 222389 | 4675   |  | 3846   | 9586  |  | 79078 | 9852  |
| 10488 | 94101  |  | 222389 | 55646  |  | 3866   | 9894  |  | 79088 | 80705 |
| 10488 | 94107  |  | 222389 | 55840  |  | 387    | 9750  |  | 79095 | 90423 |
| 10488 | 9445   |  | 222389 | 80022  |  | 3887   | 5013  |  | 79098 | 9456  |
| 10488 | 9482   |  | 222389 | 84285  |  | 389741 | 4188  |  | 79173 | 7965  |
| 10488 | 9524   |  | 222389 | 85403  |  | 389741 | 84445 |  | 7918  | 84445 |
| 10488 | 9554   |  | 222484 | 23089  |  | 391257 | 9063  |  | 79230 | 80321 |
| 10488 | 9783   |  | 222484 | 253827 |  | 392    | 57085 |  | 79415 | 90993 |
| 10488 | 9791   |  | 222484 | 29116  |  | 3927   | 9319  |  | 79571 | 8405  |
| 10490 | 9482   |  | 222484 | 3603   |  | 3937   | 9402  |  | 79571 | 84970 |
| 10494 | 11235  |  | 222484 | 506    |  | 3937   | 9513  |  | 79571 | 92822 |
| 10513 | 147746 |  | 222484 | 51068  |  | 3939   | 3945  |  | 79571 | 9702  |
| 10513 | 84795  |  | 222484 | 51447  |  | 4001   | 9063  |  | 79666 | 8545  |
| 10534 | 902    |  | 222484 | 51540  |  | 4004   | 6660  |  | 79760 | 79833 |
| 10538 | 3726   |  | 222484 | 55037  |  | 4005   | 4670  |  | 79763 | 810   |
| 10539 | 2896   |  | 222484 | 5601   |  | 401152 | 801   |  | 7984  | 80258 |
| 10539 | 57019  |  | 222484 | 5607   |  | 402    | 5147  |  | 79959 | 9465  |
| 10539 | 7571   |  | 222484 | 7186   |  | 404550 | 5530  |  | 80125 | 85403 |
| 10541 | 3841   |  | 222484 | 7448   |  | 410    | 9319  |  | 80125 | 8576  |
| 10541 | 60343  |  | 222484 | 79016  |  | 4105   | 7726  |  | 80198 | 84464 |
| 10586 | 9240   |  | 222484 | 80007  |  | 4105   | 91647 |  | 80256 | 9457  |
| 10589 | 4005   |  | 222484 | 80131  |  | 4110   | 55621 |  | 80256 | 9618  |
| 10589 | 6880   |  | 222484 | 84991  |  | 414301 | 56477 |  | 80321 | 84775 |
| 10589 | 79666  |  | 222484 | 85007  |  | 4188   | 50717 |  | 8065  | 9616  |
| 10597 | 9189   |  | 222484 | 8503   |  | 4188   | 527   |  | 80817 | 8434  |
| 10615 | 201181 |  | 222484 | 9295   |  | 4188   | 57474 |  | 81853 | 83988 |
| 10615 | 23503  |  | 222546 | 6628   |  | 4188   | 60370 |  | 81926 | 8601  |
| 10615 | 84080  |  | 2239   | 81926  |  | 4188   | 7050  |  | 81926 | 9240  |
| 10615 | 84619  |  | 2239   | 892    |  | 4188   | 7695  |  | 8266  | 9618  |
| 10640 | 26098  |  | 2274   | 3055   |  | 4188   | 7766  |  | 83755 | 93185 |
| 10640 | 30000  |  | 2274   | 391257 |  | 4188   | 81926 |  | 84080 | 91544 |
| 10687 | 147687 |  | 2274   | 56243  |  | 4188   | 83538 |  | 84108 | 8892  |
| 10687 | 84080  |  | 2274   | 5991   |  | 4188   | 84527 |  | 84108 | 9240  |
| 10687 | 9025   |  | 2274   | 7597   |  | 4188   | 90594 |  | 84283 | 84283 |
| 1072  | 1073   |  | 2274   | 7690   |  | 4188   | 9139  |  | 84283 | 9025  |
| 1073  | 60     |  | 2275   | 23281  |  | 4188   | 92906 |  | 84305 | 84816 |
| 10758 | 2801   |  | 2275   | 26505  |  | 4281   | 4281  |  | 8440  | 868   |
| 10758 | 7189   |  | 2275   | 4793   |  | 4281   | 7325  |  | 84445 | 84988 |
| 10797 | 55577  |  | 2275   | 51298  |  | 4292   | 55086 |  | 84456 | 84456 |
| 10801 | 23157  |  | 2275   | 5552   |  | 4342   | 9454  |  | 84528 | 9823  |

|       |        |  |       |        |  |        |       |  |       |       |
|-------|--------|--|-------|--------|--|--------|-------|--|-------|-------|
| 10807 | 8907   |  | 2275  | 7297   |  | 439    | 51608 |  | 84661 | 84726 |
| 10865 | 6660   |  | 2275  | 7965   |  | 441521 | 6285  |  | 84661 | 9070  |
| 10900 | 8907   |  | 2275  | 81853  |  | 4615   | 4615  |  | 84959 | 8502  |
| 10919 | 81926  |  | 22806 | 23641  |  | 4618   | 6938  |  | 84975 | 90993 |
| 10928 | 2874   |  | 22806 | 256302 |  | 4665   | 4739  |  | 85013 | 90993 |
| 10928 | 9702   |  | 22806 | 51765  |  | 468    | 8945  |  | 85403 | 9454  |
| 10933 | 114932 |  | 22806 | 55110  |  | 4733   | 55854 |  | 8557  | 89884 |
| 10946 | 140691 |  | 22806 | 5565   |  | 4739   | 54971 |  | 862   | 9404  |
| 10946 | 6871   |  | 22806 | 55758  |  | 4739   | 5987  |  | 862   | 9454  |
| 10966 | 2275   |  | 22806 | 7329   |  | 4739   | 63948 |  | 8636  | 8636  |
| 10979 | 116173 |  | 22806 | 7341   |  | 4739   | 7024  |  | 875   | 875   |
| 11016 | 53615  |  | 22806 | 91647  |  | 4783   | 51421 |  | 8796  | 9111  |
| 11030 | 145946 |  | 22806 | 9747   |  | 4800   | 84872 |  | 8834  | 89885 |
| 11030 | 146664 |  | 22827 | 22827  |  | 4800   | 9747  |  | 8834  | 90993 |
| 11030 | 166863 |  | 22827 | 29115  |  | 4801   | 56655 |  | 8939  | 9444  |
| 11030 | 23132  |  | 22827 | 5910   |  | 4841   | 4841  |  | 8976  | 9025  |
| 11030 | 2483   |  | 22827 | 6477   |  | 4899   | 57125 |  | 89885 | 9144  |
| 11030 | 57459  |  | 22827 | 80306  |  | 4931   | 7329  |  | 90423 | 9550  |
| 11043 | 1329   |  | 22893 | 84445  |  | 4950   | 89885 |  | 9111  | 9111  |
| 11043 | 1641   |  | 22920 | 4688   |  | 5013   | 54507 |  | 91544 | 9470  |
| 11043 | 285753 |  | 22924 | 4005   |  | 5013   | 84661 |  | 93621 | 9643  |
| 11043 | 342132 |  | 22924 | 5682   |  | 5013   | 8601  |  | 95    | 95    |
| 11043 | 51619  |  | 22929 | 22929  |  |        |       |  |       |       |



### **Supplementary Note 1. Distribution of 454 reads for unique sISTs.**

There is a key difference between using next-generation sequencing for determining DNA sequences and using it for identifying sISTs. Determining genomic DNA sequences with next-generation sequencing requires high coverage because the goal is to determine every nucleotide correctly; identifying sISTs does not require high coverage (a few mismatches per read is not problematic). One read of 15 bases on both sides (our definition of usable reads) is enough to identify the sIST from our search space of 6,000 genes. The total number of nucleotides for our search space is ~9 million (6,000 genes times average length of 1,500 bp). As  $4^{15} > 1$  billion, the chance of having two 15 mers with the same sequence in our search space at random is less than 1 in 100. In our sequencing results, on average we have at least 50 bases on each side of the usable reads. This is basically how we did Sanger sequencing in the past: only the first 20-50 bases from a Sanger sequencing read are helpful and relevant. Each IST is only sequenced once by Sanger sequencing, whereas shotgun genomic sequencing with Sanger technology requires much higher coverage.

We have 35 sISTs identified once and 97 sISTs identified twice (**Supplementary Fig. 3**). The retest success rates of these sISTs are identical to those identified more often (**Supplementary Fig. 3**). The distribution of number of times sISTs identified fits a Poisson distribution. Based on the Poisson distribution, the fraction of missed sISTs is less than 0.3%. This is why we placed the failure rate for 454 sequencing at 0% (**Supplementary Fig. 4**). If we double the number of sISTs for one 454 run (in other words, decrease the coverage by half), the fraction of missed sISTs is still expected to be less than 5%, which is about the same failure rate as Sanger sequencing.

### **Supplementary Note 2. Data quality assessment of HI-NGS.**

The PRS set was initially chosen from the HI1 search space because at the time only clones from that search space were available. Here we only screened 2,275 genes in the HI1 search space (**Fig. 2a**), therefore, only 21 PRS interactions were screened in HI-NGS search space, 6 of which are found positive in our screen (29% success rate, which is comparable to the Braun *et al.*<sup>1</sup> success rate of 25%). Furthermore, 8 RRS pairs (negative controls) were also screened in HI-NGS space and none of them were found positive.

### **Supplementary Note 3. Comprehensive comparison of HI1 and HI-NGS.**

**Overlaps between HI1 and HI-NGS.** The screen to produce HI-NGS used a newly-developed HT-Y2H pipeline<sup>2</sup> with yeast strains *MATa* Y8800 and *MATα* Y8930 containing *HIS3* and *ADE2* reporter genes<sup>3</sup>. In contrast, HI1 was produced with yeast strains *MATa* MaV103 and *MATα* MaV203 containing a different set of reporter genes (*HIS3*, *URA3*, and *lacZ*)<sup>4</sup>. The common search space between HI-NGS and HI1 is 2,275 DB-Genes × 2,275 AD-Genes (~  $2.6 \times 10^6$  protein pairs). In this common space, HI1 has 689 interactions, 127 of which are recovered in HI-NGS. This overlap is what is expected given the completeness, assay- and sampling sensitivity of the two experiments<sup>5</sup>.

The search space of HI-NGS was screened once and not driven to saturation. We have previously quantified the “sampling sensitivity” of our high-throughput screens to ~35-50% of all Y2H-detectable interactions<sup>5</sup>. The assay sensitivities of the two different Y2H implementations are quite different and overlap by about 40%. By combining these values we find that the observed overlap of 127 interactions agrees well with the expected overlap ( $689 \times 50\% \times 40\% = 138$ ;  $P = 0.2$ , meaning that the actual overlap of 127 interactions is not significantly different from the theoretical overlap of 138 interactions).

**Comparison of search space and number of identified interactions.** Our PCR-stitching-into-next-generation-sequencing methodology, or Stitch-Seq, increases throughput and decreases cost, but does not significantly increase the coverage of interaction screens. The overall coverage of interaction screens is determined by “completeness”, “assay-sensitivity”, and “sampling sensitivity” as thoroughly analyzed in yeast<sup>3</sup> and human<sup>5</sup>. Next-generation sequencing does increase sequencing coverage, as we will be able to detect all sISTs that are successfully PCR stitched (in this manuscript, 454 sequencing identified 1,771 sISTs whereas Sanger sequencing identified 1,602 ISTs). This deficit can be easily remedied by re-sequencing all failed ISTs, as they are easy to identify in the Sanger sequencing results. We did not re-sequence failed ISTs because our aim was simply to demonstrate that the Stitch-Seq method works.

Our search space is  $5,619 \times 5,619$  genes. The number of interactions (820) identified in our screen using Sanger sequencing agrees with our previous results. We can show this by calculating the expected number of interactions from a space of  $5,619 \times 5,619$  with two methods:

1. A previous study from our group<sup>5</sup> concluded that: “the sampling sensitivity per screen is 53%, and that after a saturating number of screens, Y2H-CCSB can identify 118 interactions per million pairs tested.” Our search space is  $5,619 \times 5,619 / 2 = 15.8$  million pairs.  $15.8 \times 118 \times 53\% = 988$ , in close agreement with the 979 interactions identified by 454 sequencing. Because we did not re-sequence the failed IST pairs, we would lose about 10% of the ISTs:  $988 \times 90\% = 889$  close to the 820 interactions identified by Sanger sequencing in our screen.
2. We previously screened a space of  $8,000 \times 8,000$  and produced 2,754 interactions for HII<sup>4</sup>. Our space is about 49% of HII:  $2,754 \times 49\% \times 53\% = 715$ . The 820 interactions identified by Sanger sequencing in our screen exceeds the expected number<sup>4</sup>.

#### **Supplementary Note 4. Extrapolation to mapping the whole human interactome.**

we previously estimated the size of the human interactome to be ~130,000 binary protein-protein interactions<sup>5</sup> (excluding additional complexity expected from splicing isoforms). Our HT-Y2H pipeline is able to determine ~25% of these interactions<sup>1</sup>, or 32,500 interactions. In our human ORFeome v3.1 collection, ~97% of ORFs are shorter than 3 kb and >99% of all possible ORF combinations are less than 6 kb, a size range that works well with our Stitch-Seq strategy. For each pair to be successfully identified, all three PCR reactions have to succeed. With a PCR failure rate of 5%, the probability for all

three PCR reactions to be successful is  $(100\% - 5\%)^3 = 85\%$ . Therefore, we need to PCR stitch (with all three reactions) three times to be able to produce at least one successful sIST for one interacting pair [ $100\% - (100\% - 85\%)^3 = 99\%$ ]. For 32,500 interactions, we would have  $32,500 \times 3 \times 3 = 292,500$  PCR reactions and generate  $32,500 \times 3 = 97,500$  sISTs for next-generation sequencing. Given that one 454 run can cover up to 10,000 sISTs, we would need about ten 454 runs, which would cost ~ \$50,000.

#### **Supplementary Note 5. Size cutoff for adapting Stitch-Seq.**

If the whole capacity of 454 is dedicated for sequencing sISTs and the Sanger sequencing cost is \$3/run, one would need to sequence at least 2,000 sISTs for Stitch-Seq to be cost effective. In our screen of a space of  $6,000 \times 6,000$  ORFs, we generated 5,200 sISTs after one round of screening. Previous studies have shown that any search space needs to be screened at least four times to reach >85% saturation<sup>5</sup>. Therefore, given the current cost structure, the search space of a saturated screen should be at least  $2,500 \times 2,500$  for cost-effective adoption of this new approach.

If the search space is smaller than  $2,500 \times 2,500$  protein pairs, it does not necessarily mean that the Stitch-Seq methodology cannot be used. For smaller screens one can simply combine the sISTs with some other sequencing samples for a single 454 run. Hence there really is no size restriction for adopting this method. The sISTs sequencing will work with almost any other sequencing samples because the 82 bp linker sequence has no matching sequence in GenBank. When combining sISTs with other samples potential complications for assembling these other samples would need to be considered.

#### **Supplementary Note 6. Useful read length and implementation of paired-end sequencing.**

That only 5% of all 454 reads in our experiments produced sISTs at the end might seem troublesome, but this limitation is shared to some extent by all current IST or sIST sequencing strategies.

With Sanger technology, a similarly small fraction of each sequence trace is usable for identification of the interaction partners (~20-30 bases are sufficient) and hence >95% of sequence information is discarded.

Paired-end technology faces from the same problem. Due to the short read-length and the necessary fragmentation of the stitched amplicon, many fragments will not have enough sequence to identify both ORFs and hence will not identify interacting pairs. We can calculate that ~10% of paired-end reads would identify the interacting ORF pair. The average length of the sISTs in human ORFeome v3.1 is 3 kb and the average fragment length for sequencing is 500 bp. The 5' end of fragments for useful paired-end reads therefore has to be within a 352 bp region (500 bp less 82 bp linker less ~30 bp to identify each ORF). Therefore,  $352/3,000 \approx 10\%$ .

Our experiments were done with an earlier generation of 454 chemistry (454 FLX). Since then we have evaluated the more advanced 454 Titanium chemistry, which uses an input library of on average 500 bp fragments and yields read-lengths of ~400 bp, of which ~10% are informative for identification of interacting pairs.

### Supplementary Note 7. Vector sequences for pDEST-ADCYH and pDEST-DB.

The following pDEST-DB and pDEST-ADCYH vectors have been used in interactome mapping projects for yeast, worm and human<sup>1-9</sup>.

#### pDEST-DB vector sequence

```

LOCUS           pDest_pPC97 (pDEST-DB) 10262 bp ds-DNA circular 23-FEB-2011
ACCESSION
VERSION
SOURCE
ORGANISM
FEATURES             Location/Qualifiers
     misc_feature    2066..2172
                     /note="attr1 site"
terminator          3983..4449
                     /note="ADH1 TT"
misc_feature        complement(3795..3919)
                     /note="attr2 site"
rep_origin          7629..8005
                     /note="ARS209"
misc_feature        3449..3754
                     /note="ccdB gene"
CDS                 5805..6899
                     /note="LEU2"
misc_feature        2449..3107
                     /note="CmR"
primer_bind         complement(4484..4501)
                     /note="M13-fwd"
CDS                 8178..9137
                     /note="AmpR"
primer_bind         complement(4458..4485)
                     /note="T7"
promoter            113..1564
                     /note="ADH1 promoter"
CDS                 4572..4640
                     /note="LacZ alpha"
rep_origin          8015..8043
                     /note="CEN6"
gene                1573..2032
                     /note="GAL4 region"
CDS                 1592..2032
                     /note="GAL4-DB"
gene                5157..7376
                     /note="LEU2 region"
rep_origin          complement(4646..5086)
                     /note="F1 ori"
ORIGIN
1 agcggataac aatttcacac aggaaacagc tatgaccatg attacgcaa gctcgggaatt
61 aaccctcact aaaggaaca aaagctgggt accgggcccc cctcgcgat ccgggatcga
121 agaaatgatg gtaaatgaaa taggaaatca aggagcatga aggcaaaaga caaatataag
181 ggtcgaacga aaaataaagt gaaaagtgtt gatatgatgt atttggcttt gcggcgccga
241 aaaaaacgagt ttacgcaatt gcacaatcat gctgactctg tggcggacc cgcgctcttgc
301 cggcccggcg ataacgctgg gcgtgaggct gtgcccggcg gagttttttg cgcctgcatt
361 ttccaaggtt taccctgcbc taaggggcga gattggagaa gcaataagaa tgccgggttg
421 ggttgcgatg atgacgacca cgacaactgg tgtcattatt taagttgccg aaagaacctg
481 agtgcatctg caacatgagt atactagaag aatgagccaa gacttgcgag acgcgagttt
541 gccggtggtg cgaacaatag agcgaccatg accttgaagg tgagacgcgc ataaccgcta
601 gagtactttg aagaggaaac agcaaataggg ttgctaccag tataaataga caggtacata
661 caacactgga aatggttgtc tgtttgagta cgctttcaat tcatttgggt gtgcaactta
721 ttatggttaca atatggaagg gaactttaca cttctcctat gcacatatat taattaaagt

```

|      |             |             |             |             |             |             |
|------|-------------|-------------|-------------|-------------|-------------|-------------|
| 781  | ccaatgctag  | tagagaaggg  | gggtaacacc  | cctccgcgct  | cttttcgat   | ttttttctaa  |
| 841  | accgtggaat  | atttcgggata | tccttttggtt | gtttccgggt  | gtacaatatg  | gacttccctct |
| 901  | tttctggcaa  | ccaaacccat  | acatcgggat  | tcctataata  | ccttcggtgg  | tctccctaac  |
| 961  | atgtaggtag  | cggagggggag | atatacaata  | gaacagatac  | cagacaagac  | ataatgggct  |
| 1021 | aaacaagact  | acaccaatta  | cactgcctca  | ttgatggtag  | tacataacga  | actaatctg   |
| 1081 | tagccttaga  | cttgatagcc  | atcatcatat  | cgaagtttca  | ctaccctttt  | tccatttgcc  |
| 1141 | atctattgaa  | gtaataatag  | gcgcagcaaa  | cttcttttct  | ttttttttct  | tttctctctc  |
| 1201 | ccccgttggt  | gtctcaccat  | atccgcaatg  | acaaaaaaaa  | tgatggaaga  | cactaaagga  |
| 1261 | aaaaattaac  | gacaaagaca  | gcaccaacag  | atgtcgttgt  | tccagagctg  | atgaggggta  |
| 1321 | tcttcgaaca  | cacgaaactt  | tttcttctct  | tcattcaccg  | acactactct  | ctaattgagca |
| 1381 | acggatatac  | gccttccttc  | cagttacttg  | aatttgaat   | aaaaaaaaagt | tgccgctttg  |
| 1441 | ctatcaagta  | taaatagacc  | tgcaattatt  | aatcttttgt  | ttcctcgtca  | ttgttctcgt  |
| 1501 | tccttttctt  | ccttgtTTCT  | TTTCTGCAC   | AATATTTCAA  | GCTATACCAA  | GCATACAATC  |
| 1561 | AACTCCAAGC  | TTGAAGCAAG  | CCTCCTGAAA  | GATGAAGCTA  | CTGTCTTCTA  | TCGAACAAAGC |
| 1621 | ATGCGATATT  | TGCCGACTTA  | AAAAGCTCAA  | GTGCTCCAAA  | GAAAAACCGA  | AGTGCGCCAA  |
| 1681 | GTGTCTGAAG  | AACAACCTGGG | AGTGTGCTA   | CTCTCCCAA   | ACCAAAAGGT  | CTCCGCTGAC  |
| 1741 | TAGGGCACAT  | CTGACAGAAG  | TGGAATCAAG  | GCTAGAAAAG  | CTGGAACAGC  | TATTTCTACT  |
| 1801 | GATTTTCTCT  | CGAGAAGACC  | TTGACATGAT  | TTTGAAAATG  | GATTCTTTAC  | AGGATATAAA  |
| 1861 | AGCATGTGTA  | ACAGGATTAT  | TTGTACAAGA  | TAATGTGAAT  | AAAGATGCCG  | TCACAGTAG   |
| 1921 | ATTGGCTTCA  | GTGGAGACTG  | ATATGCCTCT  | AACATTGAGA  | CAGCATAGAA  | TAAGTGCGAC  |
| 1981 | ATCATCATCG  | GAAGAGAGTA  | GTAAACAAAGG | TCAAAGACAG  | TTGACTGTAT  | CGtcgagGTC  |
| 2041 | GAATCAAAACA | AGTTTGTACA  | AAAAAGCTGA  | ACGAGAAAACG | TAAAATGATA  | TAAATATCAA  |
| 2101 | TATATTAAT   | TAGATTTTGC  | ATAAAAAACA  | GACTATAAA   | TACTGTAAAA  | CACAACATAT  |
| 2161 | CCAGTCACTA  | TGGCGGCCGC  | GGGTGATGCT  | GCCAACTTAG  | CGGCCGCTAA  | GTTGGCAGCA  |
| 2221 | TCACCGACG   | CACTTTGC    | CGAATAAATA  | CCTGTGACGG  | AAGATCACTT  | CGCAGAATAA  |
| 2281 | ATAAATCCTG  | GTGTCCCTGT  | TGATACCCGGG | AAGCCCTGGg  | CCAACTTTTG  | CGCAAAATGA  |
| 2341 | GCGTGTGATC  | GGCAGTAAG   | AGGTTCCAAC  | TTTCACTATA  | ATGAAAATAAG | ATCACCTCCG  |
| 2401 | GGCGTATTTT  | TTGAGTCATC  | GAGATTTTCA  | GGAGCTAAGG  | AAGCTAAAAT  | GGAGAAAAAA  |
| 2461 | ATCACTGGAT  | ATACCACCGT  | TGATATATCC  | CAATGGCATC  | GTAAGAACA   | TTTTGAGGCA  |
| 2521 | TTTCACTCAG  | TTGCTCAATG  | TACCTATAAC  | CAGACCGTTC  | AGCTGGATAT  | TACGGCCTTT  |
| 2581 | TTAAAGACCG  | TAAAGAAAAA  | TAAGCACAAAG | TTTTATCCGG  | CCTTTATTCA  | CATTCTTGCC  |
| 2641 | CGCCTGATGA  | ATGCTCATCC  | GGAATTCCGT  | ATGGCAATGA  | AAGACGGTGA  | GCTGGTGATA  |
| 2701 | TGGGATAGTG  | TTCACCCCTG  | TTACACCGTT  | TTCATGAGC   | AAACTGAAAC  | GTTTTTCATCG |
| 2761 | CTCTGGAGTG  | AATACCACGA  | CGATTTCCGG  | CAGTTTCTAC  | ACATATATTC  | GCAAGATGTG  |
| 2821 | GCGTGTATACG | GTGAAAACCT  | GGCCTATTTC  | CCTAAAGGGT  | TTATTGAGAA  | TATGTTTTTC  |
| 2881 | GTCTCAGCCA  | ATCCCTGGGT  | GAGTTTACC   | AGTTTTGATT  | TAAACGTGGC  | CAATATGGAC  |
| 2941 | AACCTCTTCG  | CCCCGTTTTT  | CACCATGGGC  | AAATATTATA  | CGCAAGGCGA  | CAAGGTGCTG  |
| 3001 | ATGCCGCTGG  | CGATTCAGGT  | TCATCATGCC  | GTTTGTGATG  | GCTTCCATGT  | CGGCAGAATG  |
| 3061 | CTTAATGAAT  | TACAACAGTA  | CTGCGATGAG  | TGGCAGGCGG  | TGGCATAATCT | AGAGCTCCG   |
| 3121 | GCTTACTAAA  | AGCCAGATAA  | CAGTATGCGT  | ATTTGCGCGC  | TGATTTTTGC  | GGTATAAGAA  |
| 3181 | TATATACTGA  | TATGTATACC  | CGAAGTATGT  | CAAAAAGAGG  | TATGCTATGA  | AGCAGCGTAT  |
| 3241 | TACAGTGACA  | GTTGACAGCG  | ACAGCTATCA  | GTTGCTCAAG  | GCATATATGA  | TGTCAATATC  |
| 3301 | TCCGCTTGG   | TAAGCACAAAC | CATGCAGAAAT | GAAGCCCCTC  | GTCTGCGTGC  | CGAACCTGG   |
| 3361 | AAAGCGGAAA  | ATCAGGAAGG  | GATGGCTGAG  | GTCGCCCGGT  | TTATTGAAAT  | GAACGGCTCT  |
| 3421 | TTTGTCTGACG | AGAACAGGGG  | CTGGTGAAAT  | GCAGTTTAAAG | GTTTACACCT  | ATAAAAGAGA  |
| 3481 | GAGCCGTTAT  | CGTCTGTTTTG | TGGATGTACA  | GAGTGTATAT  | ATTGACACCG  | CCGGGCGACG  |
| 3541 | GATGGTGTATC | CCCCTGGCCA  | GTGACGCTCT  | GCTGTGAGAT  | AAAGTCCCCC  | GTGAACCTTTA |
| 3601 | CCCGTGGTG   | CATATCGGGG  | ATGAAAGCTG  | GCGCATGATG  | ACCACCGATA  | TGGCCAGTGT  |
| 3661 | GCCGCTCTCC  | GTTATCGGGG  | AAGAAGTGGC  | TGATCTCAGC  | CACCGCGAAA  | ATGACATCAA  |
| 3721 | AAACGCCATT  | AACCTGATGT  | TCTGGGGAAT  | ATAAAATGTCA | GGCTCCCTTA  | TACACAGCCA  |
| 3781 | GTCTGTGAGT  | CGACCATAGT  | GACTGGATAT  | GTGTGTTTTT  | ACAGTATTAT  | GTAGTCTGTT  |
| 3841 | TTTTATGCAA  | AATCTAATTT  | AATATATTGA  | TATTTATATC  | ATTTTACGTT  | TCTCGTTCAG  |
| 3901 | CTTCTTGTA   | CAAAGTGGTT  | TGATGGCCCG  | TAAGtaagta  | agacgtcgag  | ctctaagtaa  |
| 3961 | gtaacggccg  | ccaccgcggt  | ggAGCTTTGG  | ACTTCTTCGC  | CAGAGGTTTTG | GTCAAGTCTC  |
| 4021 | CAATCAAGGT  | TGTCGGCTTG  | TCTACCTTGC  | CAGAAAATTTA | CGAAAAGATG  | GAAAAGGGTC  |
| 4081 | AAATCGTTGG  | TAGATACGTT  | GTTGACACTT  | CTAAATAAGC  | GAATTTCTTA  | TGATTTATGA  |
| 4141 | TTTTTATTAT  | TAAATAAGTT  | ATAAAAAAAA  | TAAAGTGTATA | CAAATTTTAA  | AGTGACTCTT  |
| 4201 | AGGTTTTAAA  | ACGAAAATTC  | TTATTTCTTGA | GTAACCTTTT  | CCTGTAGGTC  | AGGTTGCTTT  |
| 4261 | CTCAGTGATA  | GCATGAGGTC  | GCTCTTATTG  | ACCACACCTC  | TACCGGCATG  | CCGAGCAAT   |
| 4321 | gcctgcaaat  | cgctccccat  | ttcacccaat  | tgtagatatg  | ctaactccag  | caatgagttg  |
| 4381 | atgaatctcg  | gtgtgtattt  | tatgtcctca  | gaggacaaca  | cctggtgtaa  | tcgttcttcc  |
| 4441 | acacggatcc  | caattcgccc  | tatagtgagt  | cgtattacaa  | ttcactggcc  | gtcgttttac  |
| 4501 | aacgtcgtga  | ctggGAAAAC  | CCTGGCGTTA  | CCCAACTTAA  | TGCGCTTGCA  | GCACATCCCC  |
| 4561 | CTTTCGCCAG  | CTGGCGTAAT  | AGCGAAGAGG  | CCCGCACCGA  | TGCGCCCTTC  | CAACAGTTGC  |
| 4621 | GCAGCTGAA   | TGGCGAATGG  | ACGCGCCCTG  | TAGCGGCGCA  | TTAAGCGCGG  | CGGGTGTGGT  |
| 4681 | GGTTACGCGC  | AGCGTGACCG  | CTACACTTGC  | CAGCGCCCTA  | GCGCCCGCTC  | CTTTCGCTTT  |
| 4741 | CTTCCCTTCC  | TTTCTCGCCA  | CGTTCGCCCG  | CTTTCCTTAA  | CAAGCTCTAA  | ATCGGGGGCT  |
| 4801 | CCCTTtaggg  | TTCCGATTTA  | GTGCTTTACG  | GCACCTCGAC  | CCCCAAAAAC  | TTGATTAGGG  |
| 4861 | TGATGTTTCA  | CGTAGTGGGC  | CATCGCCCTG  | ATAGACGGTT  | TTTCGCCCTT  | TGACGTTGGA  |
| 4921 | GTCCACGTTT  | TTTAATAGTG  | GACTCTTGTT  | CCAAACTGGA  | ACAACACTCA  | ACCCTATCTC  |
| 4981 | GCTCTATTCT  | TTTGATTTAT  | AAGGATTTT   | GCCGATTTTC  | GCTTATTGGT  | TAAAAAATGA  |
| 5041 | GCTGATTTAA  | CAAAAATTTA  | ACGCGAATTT  | TAAACAAAATA | TTAACGCTTA  | CAATTTCTCTG |

|      |             |             |             |             |             |             |
|------|-------------|-------------|-------------|-------------|-------------|-------------|
| 5101 | ATGCGGTATT  | TTCTCCTTAC  | GCATCTGTGC  | GGTATTTTAC  | ACCGCATATC  | GACCGGTCGA  |
| 5161 | GGAGAACTTC  | TAGTATATCT  | ACATACCTAA  | TATTATTGCC  | TTATTAATAA  | TGGAATCCCA  |
| 5221 | ACAAATFACAT | CAAAATCCAC  | ATTCTCTTCA  | AAATCAATTG  | TCCTGTACTT  | CCTTGTTCAT  |
| 5281 | GTGTGTTCAA  | AAACGTTATA  | TTTATAGGAT  | AATTATACTC  | TATTTCTCAA  | CAAGTAATTG  |
| 5341 | GTTGTTTGGC  | CGAGCGGTCT  | AAGGCGCCTG  | ATTCAAGAAA  | TATCTTGACC  | Gcagttaact  |
| 5401 | gtgggaatac  | tcaggtatcg  | taagatgcaa  | gagttcgaat  | ctcttagcaa  | ccattatfff  |
| 5461 | tttcttcaac  | ataacgagaa  | cacacagggg  | cgctatcgca  | cagaatcaaa  | ttcogatgact |
| 5521 | ggaaatffff  | tgtaaatfff  | agaggtcgcc  | tgacgcatat  | acctffffta  | actgaaaaat  |
| 5581 | tgggagaaaa  | aggaaaggtg  | agagcgccgg  | aaccggcttt  | tcatatagaa  | tagagaagcg  |
| 5641 | ttcatgacta  | aatgcttgca  | tcacaatact  | tgaagttgac  | aatattatff  | aaggacctat  |
| 5701 | tgttttttcc  | aataggtggg  | tagcaatcgt  | cttactttct  | aacttttctt  | accttttaca  |
| 5761 | tttcagcaat  | atataatata  | atatttcaag  | gatataccat  | tctaattgct  | gcccctaaga  |
| 5821 | agatcgtcgt  | tttgccaggt  | gaccacgttg  | gtcaagaaat  | cacagccgaa  | gccattaagg  |
| 5881 | ttcttaaagc  | tatttctgat  | gttcggtcca  | atgtcaagtt  | cgatttcgaa  | aatcatttaa  |
| 5941 | ttgggtgggc  | tgctatcgat  | gctacaggtg  | ttccacttcc  | agatgagggc  | ctggaagcgt  |
| 6001 | ccaagaaggc  | tgatgccggt  | ttggttaggtg | ctgtgggtgg  | tcctaaatgg  | ggtagccgta  |
| 6061 | gtgtagacc   | tgaaacaaggt | ttactaaaaa  | tcogtaaaaga | acttcaattg  | tacgccaaact |
| 6121 | taagaccatg  | taactttgca  | tccgactctc  | tttttagactt | atctccaatc  | aagccacaat  |
| 6181 | ttgctaaagg  | taactgacttc | gttgttgtca  | gagaattagt  | gggaggtatt  | tactttgta   |
| 6241 | agagaaagga  | agacgatggt  | gatgggtgctg | cttgggatag  | tgaacaatac  | accgttccag  |
| 6301 | aagtgcгааг  | aatcacaaga  | atggccgctt  | tcatggccct  | acaacatgag  | ccaccattgc  |
| 6361 | ctatttgggtc | cttggataaa  | gctaattgfff | tggcctcttc  | aagattatgg  | agaaaaactg  |
| 6421 | tggaggaaac  | catcaagaac  | gaattcccta  | cattgaaggt  | tcaacatcaa  | ttgatgtatt  |
| 6481 | ctgcccagcat | gatcctagtt  | aagaacccaa  | cccactaaa   | tggtattata  | atcaccagca  |
| 6541 | acatgtttgg  | tgatatcatc  | tccgatgaag  | cctcogttat  | cccaggttcc  | ttgggtttgt  |
| 6601 | tgccatctgc  | gtccttggcc  | tctttggccag | acaagaacac  | cgcatttggg  | ttgtacgaa   |
| 6661 | catgcccagc  | ttctgctcca  | gatttgccaa  | agaataaggt  | caaccctatc  | gcccactatc  |
| 6721 | tgtctgctgc  | aatgatggtg  | aaattgctcat | tgaacttgcc  | tGAAGAAGGT  | AAGGCCATTG  |
| 6781 | AAGATGCAGT  | TAAAAGGTT   | TTGGATGCAG  | GTATCAGAAC  | TGGTGATTTA  | GGTGGTTCCA  |
| 6841 | ACAGTACCAC  | CGAAGTCGGT  | GATGCTGTGC  | CCGAAGAAGT  | TAAGAAAATC  | CTTGCTTAAA  |
| 6901 | AAGATFCTCT  | TTTTTATGA   | TATTTGTACA  | TAAACTTTAT  | AAATGAAATT  | CATAATAGAA  |
| 6961 | ACGACACGAA  | ATTACAAAAT  | GGAATATGTT  | CATAGGGTAG  | ACGAAACTAT  | ATACGCAATC  |
| 7021 | TACATACATT  | TATCAAGAAG  | GAGAAAAAGG  | AGGATGTAAA  | GGAATACAGG  | TAAGCAAATT  |
| 7081 | GATACTAATG  | GCTCAACGTG  | ATAAGGAAAA  | AGAATTGCAC  | TTTAACATTA  | ATATTGACAA  |
| 7141 | GGAGGAGGGC  | ACCACACAAA  | AAGTTAGGTG  | TAACAGAAAA  | TCATGAAACT  | ATGATTCCTA  |
| 7201 | ATTTATATAT  | TGGAGGATTT  | TCTCTAAAAA  | AAAAAAAATA  | CAACAAATAA  | AAAAACTCA   |
| 7261 | ATGACCTGAC  | CATTTGATGG  | AGTTTAAGTC  | AATACCTTCT  | TGAACCATTT  | CCCATAATGG  |
| 7321 | TGAAAGTTCC  | CTCAAGAATT  | TTACTCTGTCT | AGAAAACGGCC | TTAACGACGT  | AGTCGATATG  |
| 7381 | TGCACTCTCT  | AGTACAATCT  | GCTCTGATGC  | CGCATAGTTA  | AGCCGACCCC  | GACACCCGCC  |
| 7441 | AACACCCGCT  | GACGCGCCCT  | GACGGGCTTG  | TCTGCTCCCG  | GCATCCGCTT  | ACAGACAAGC  |
| 7501 | TGTGACCGTC  | TCCGGGAGCT  | GCATGTGTCA  | GAGTTTTTCA  | CCGTCATCAC  | CGAAACGCGC  |
| 7561 | GAGACGAAAG  | GGCCTCGTGA  | TACGCCTATT  | Ttataaggtt  | aatgtcatga  | TAATAATGGT  |
| 7621 | TTCTTAggac  | ggatcgcttg  | cctgtaacct  | acacgcgcct  | cgatcttttt  | aatgatgaa   |
| 7681 | taatttggga  | atttactctg  | tgtttatffa  | tttttatggt  | ttgtatfttg  | atftttagaaa |
| 7741 | gtaataaag   | aaggtagaag  | agttacggaa  | tgaagaaaaa  | aaaataaaca  | aaggtfttaa  |
| 7801 | aaatttcaac  | aaaaagcgta  | ctttacatat  | atattttatta | gacaagaaaa  | gcagattaaa  |
| 7861 | tagatataca  | ttcgattaac  | gataagtaaa  | atgtaaaatc  | acaggatfff  | cgtggtggtg  |
| 7921 | cttctacaca  | gacaagatga  | aacaattcgg  | cattaataacc | tgagagcagg  | aagagcaaga  |
| 7981 | taaaaggtag  | tatttgttgg  | cgatccccct  | agagtctttt  | acatcttcgg  | aaaacaaaaa  |
| 8041 | ctattttttc  | tttaatttct  | ttttttactt  | tctattttta  | atfttatatat | ttatattaaa  |
| 8101 | aaatttaaat  | tataattatt  | tttatagcac  | gtgatgaaaa  | ggaccaggt   | ggcattttc   |
| 8161 | ggggaaatgt  | gcgcggaacc  | cctatttgggt | tatttttcta  | aatacattca  | aatatgtatc  |
| 8221 | cgctcatgag  | acaataacc   | tgataaatgc  | ttcaataata  | ttgaaaaagg  | aagagtatga  |
| 8281 | gtattcaaca  | tttccgtgct  | gcccttattc  | ccttttttgc  | ggcatttttgc | cttccctgft  |
| 8341 | ttgctcaacc  | agaaacgctg  | gtgaaagtaa  | aagatgctga  | agatcagttg  | ggtgcacgag  |
| 8401 | tgggttacat  | cgaactggat  | ctcaacagcg  | gtaagatcct  | tgagagtttt  | cgccccgaag  |
| 8461 | aacgttttcc  | aatgatgagc  | acttttaag   | ttctgctatg  | tggcgcggta  | ttatcccgta  |
| 8521 | ttgacgccc   | gcaagagcaa  | ctcggtcgcc  | gcatacacta  | ttctcagaat  | gacttggttg  |
| 8581 | agtactcacc  | agtcacagaa  | aagcatctta  | cggatggcat  | gacagtaaga  | gaattatgca  |
| 8641 | gtgctgccat  | aacctagatg  | gataaacactg | cggccaactt  | acttctgaca  | acgatcggag  |
| 8701 | gaccgaagga  | gctaaccgct  | ttttttcaca  | acatggggga  | tcatgtaact  | cgccttgatc  |
| 8761 | gttgggaacc  | ggagctgaat  | gaagccatac  | caaacgacga  | cgtgtgacacc | acgatgcctg  |
| 8821 | tagcaatggc  | aacaacgttg  | cgcaaatat   | taactggcga  | actacttact  | ctagctccc   |
| 8881 | ggcaacaatt  | aatagactgg  | atggagcggg  | ataaagttgc  | aggaccactt  | ctgctcggc   |
| 8941 | cccttccggc  | tggctggttt  | attgctgata  | aatctggagc  | cgtgtgagcgt | gggtctcggc  |
| 9001 | gtatcattgc  | agcactgggg  | ccagatggta  | agccctccc   | tatcgtagtt  | atctacacga  |
| 9061 | cgggcagtca  | ggcaactatg  | gatgaacgaa  | atagacagat  | cgctgagata  | ggtgcctcac  |
| 9121 | ttgtaagca   | ttggttaactg | tcagaccaag  | tttactcata  | tatactfttag | attgatttaa  |
| 9181 | aacttcattt  | ttaatftaaa  | aggatctagg  | tgaagatcct  | ttttgataat  | ctcatgacca  |
| 9241 | aaatccctta  | acgtgagttt  | tcgttccact  | gagcgtcaga  | ccccgtagaa  | aagatcaagg  |
| 9301 | gatcttcttg  | agatcctttt  | ttctgctcgg  | taatctgctg  | cttgcaaca   | aaaaaacac   |
| 9361 | cgctaccagc  | ggtggtttgt  | ttgcccagtc  | aagagctacc  | aactcttttt  | ccgaaggtaa  |

```

9421 ctggcttcag cagagcgcag ataccaaata ctgttcttct agtgtagccg tagttaggcc
9481 accacttcaa gaactctgta gcaccgccta catacctcgc tctgctaate ctgttaccag
9541 tggctgctgc cagtggcgat aagtcgtgct ttaccgggtt ggactcaaga cgatagttac
9601 cggataaggc gcagcggctc ggctgaacgg ggggttcgtg cacacagccc agcttggagc
9661 gaacgaccta caccgaactg agatacctac agcgtgagct atgagaaagc gccacgcttc
9721 ccgaaggagg aaaggcggac aggtatccgg taagcggcag ggtcggaaaca ggagagcgca
9781 cgaggaggct tccaggggga aacgcctggt atctttatag tctgtcggg tttcgccacc
9841 tctgacttga gcgtcgattt ttgtgatgct cgtcaggggg gcggagccta tggaaaaacg
9901 ccagcaacgc ggctttttta cggttctctg ccttttgctg gccttttgct cacatgttct
9961 ttcctgcggt atcccctgat tctgtggata accgtattac cgcttttgag tgagctgata
10021 ccgctcgccg cagccgaacg accgagcgca gcgagtcagt gagcgaggaa gcggaagagc
10081 gcccaatacg caaacgcctc ctcccgcgcg gttggccgat tcattaatgc agctggcagc
10141 acaggtttcc cgactggaaa gcgggcagtg agcgaacgcg aattaatgtg agttagctca
10201 ctcattagge accccaggct ttacacttta tgcctccggc tcgtatggtg tgtggaattg
10261 tg

```

//

## pDEST-ADCYH vector sequence

LOCUS pDest-pPC86+CYH (pDEST-ADCYH) 10408 bp ds-DNA circular 18-JAN-2006

COMMENT Uppercase parts were sequenced directly; remainder inferred from known plasmids.

COMMENT

```

FEATURES             Location/Qualifiers
Promoter              1573..3026
                     /note="ADH1 promoter"
CDS                   3035..3055
                     /note="SV40 NLS"
CDS                   3065..3412
                     /note="GAL4 AD"
terminator            5357..5823
                     /note="ADH1 TT"
gene                  complement(6567..7344)
                     /note="TRP1"
rep_origin             7773..8291
                     /note="CEN6/ARSH4"
gene                  8324..9283
                     /note="AmpR"
misc_feature          3425..3546
                     /note="attr1 site"
misc_feature          complement(5169..5293)
                     /note="attr2 site"
misc_feature          4823..5128
                     /note="ccdB gene"
misc_feature          3823..4481
                     /note="CmR"
misc_feature          552..1551
                     /note="CYH2 region"
CDS                   548..997
                     /gene="CYH2"
                     /codon_start=1
                     /transl_table=11
                     /protein_id="AAA96382.1"
                     /db_xref="GI:1256572"
                     /translation="MPSRFTKTRKHRGHVSAGKGRIGKHRKHPGGRGMAGGQHHHRIN
MDKYHPGYFGKVMRYFHKQQAHFVKPVLNLDKLTWLI PEDKRDQYLKSASKETAPVI
DTLAAGYGKILGKRIPNVPVIVKARFVSKLAEKIRAAGGVVELIA"

```

BASE COUNT        2991 a            2307 c            2212 g            2898 t

ORIGIN

```

1  AGCGGATAAC  AATTTACAC  AGGAAACAGC  TATGACCATG  ATTACGCCAA  GCTCGAAATT
61  AACCCCTCACT  AAAGGGAACA  AAAGCTGGGA  TCCCCAGATT  CTATTTGCAG  TTGCCAATCC
121  TGTATCTCTT  GTGCGGCTTC  ATCAAAAGTC  ACGCCACGTA  GCTTACATAG  AGATAACTTA
181  GCATCGGTGA  CTCTTCCATG  TGCTAACAAAC  CATTTTGGAG  ATTCATCGAA  AAACACAGCA
241  AAAACAAGAG  TACTGTAACC  AATGTAACAT  CTGTACACCA  GGGACCCACA  CATTACcaaa
301  atcaaaatta  tttttcta  gccctggtat  ttttctatt  ttctctggtc  gcgtgaaatg
361  cccgcagaga  cgcaaaaca  tttctctgca  gtttttcgct  tgtttaaatgc  gtattttccc
421  agatagggtc  aaacctttca  tctgtatccc  gtatatttaa  gatggcggtt  gctttctcgc
481  ttgatttttt  tccttcttag  tgattttttt  gcattaaatc  ccagaacaat  catccaacta
541  atcaagaatg  ccttccagat  tcaactaagac  tagaaagcac  agaggtcacg  tctcagccgg

```

|      |             |             |             |             |             |             |
|------|-------------|-------------|-------------|-------------|-------------|-------------|
| 601  | taaaggtcgt  | atcggtaagc  | acagaaagca  | ccccgggtggt | agaggatggt  | ccgggtggtca |
| 661  | acatcaccac  | agaattaaca  | tggataaata  | ccatccaggt  | tatttcggta  | aggttgggtat |
| 721  | gagatacttc  | cacaagcaac  | aagctcattt  | ctggaagcca  | gtcttgaact  | tggacaatt   |
| 781  | gtggacattg  | atcccagaag  | acaagagaga  | ccaatacttg  | aaatctgctt  | ctaaggaaac  |
| 841  | tgctccagtt  | attgacactt  | tggcagccgg  | ttacggtaag  | atcttgggta  | agggtagaat  |
| 901  | cccaaatggt  | ccagttatcg  | tcaaaagctag | atctgctctcc | aagttggctg  | aagaaaaaat  |
| 961  | cagagctgct  | ggtgggtggt  | ttgaattgat  | cgcttaagcg  | catcaacaaa  | aagctctatg  |
| 1021 | tattttccaa  | taaattatat  | atcttcagtt  | taatctaatt  | caacatctac  | ttctgtatta  |
| 1081 | tttctatgaa  | aaaaaaaaaa  | aaaaaaaaaa  | aaaaaaaaaa  | aaaaaaaaaa  | aaaaaaaaaa  |
| 1141 | aaaaaaaaaa  | aaaaaaaaaa  | aaaaaaaaaa  | aaaaaaaaaa  | aagtACCAAG  | ATGGCCTTTG  |
| 1201 | GTGGGTGAA   | GAAGGAAAAA  | GACAGAAACG  | ACTTAATTAC  | CTACTTGAAA  | AAAGCCTGTG  |
| 1261 | AGTAAACAGG  | CCCCTTTTCC  | TTTGTCGATA  | TCATGTAATT  | AGTTATGTCA  | CGCTTACATT  |
| 1321 | CACGCCTCC   | CCCCACATCC  | GCTCTAACCG  | AAAAGGAAGG  | AGTTAGACAA  | CCTGAAGTCT  |
| 1381 | AGGTCCCTAT  | TTATTTTTTT  | ATAGTTATGT  | TAGTATTAAG  | AACGTTATTT  | ATATTTCAA   |
| 1441 | TTTTTCTTTT  | TTTTCTGTAC  | AGACGCGTGT  | ACGCATGTAA  | CATTATACTG  | AAAACCTTGC  |
| 1501 | TTGAGAAGGT  | TTTGGGACGC  | TCGAAGGCTT  | TAATTTGCAA  | AGCTCGGGAT  | CCGGGCCCCC  |
| 1561 | CCTCGAGATC  | CGGGATCGAA  | GAAAtgatgg  | taaatgaaat  | aggaaatcaa  | ggagcatgaa  |
| 1621 | ggcaaaagac  | aaatataagg  | gtcgaacgaa  | aaataaagtg  | aaaagtggtg  | atatgatgta  |
| 1681 | tttggctttg  | cggcgccgaa  | aaaacgagtt  | tacgcaattg  | cacaatcatg  | ctgactctgt  |
| 1741 | ggcggaccgg  | cgctcttgcc  | ggcccgcgca  | taacgctggg  | cgtgaggctg  | tgcccggcgg  |
| 1801 | agttttttgc  | gcctgcattt  | tccaaggttt  | accctgcgct  | aaggggagag  | attggagaag  |
| 1861 | caataagaat  | gccggttggg  | gttgcgatga  | tgacgaccac  | gacaactggt  | gtcattattt  |
| 1921 | aacttgcgca  | agaacctga   | gtgcatttgc  | aacatgagta  | tactagaaga  | atgagccaag  |
| 1981 | acttgcgaga  | cgcgagtttg  | cgggtggtgc  | gaacaataga  | gcgacatga   | ccttgaaaggt |
| 2041 | gagacgcgca  | taaccgctag  | agtactttga  | agaggaaaca  | gcaatagggt  | tgctaccagt  |
| 2101 | ataaatagac  | aggtacatac  | aacactggaa  | atggttgtct  | gtttgagtac  | gctttcaatt  |
| 2161 | catttgggtg  | tgacttttat  | tatgttacaa  | tatggaaggg  | aactttacac  | ttctctatg   |
| 2221 | cacatatatt  | aattaaagtc  | caatgctagt  | agagaagggg  | ggtaacacc   | ctccgcgctc  |
| 2281 | ttttccgatt  | tttttctaaa  | ccgtggaata  | tttcggatat  | ccttttggtg  | tttccgggtg  |
| 2341 | tacaatatgg  | acttctctct  | ttctggcaac  | caaaccata   | catcgggatt  | cctataatac  |
| 2401 | tctcgttggg  | ctcctaaca   | tgtagggtgg  | ggaggggaga  | tatacaatag  | aacagatacc  |
| 2461 | agacaagaca  | taatgggcta  | aacaagacta  | caccaattac  | actgcctcat  | tgatgggtgt  |
| 2521 | acataacgaa  | ctaatactgt  | agccctagac  | ttgatagcca  | tcatcatatc  | gaagtttcc   |
| 2581 | tacctttttt  | ccatttgcca  | tctattgaag  | taataatagg  | cgcgatgcaac | ttcttttctt  |
| 2641 | ttcttttctt  | ttctctctcc  | ccggttgttg  | tctcaccata  | tccgcaatag  | caaaaaaat   |
| 2701 | gatggaagac  | actaaaggaa  | aaaattaacg  | acaaagacag  | caccaacaga  | tgctggtggt  |
| 2761 | ccagagctga  | tgaggggtat  | cttcgaacac  | acgaaacttt  | ttccttccct  | cattcacgca  |
| 2821 | cactactctc  | taatgagcaa  | cgggtatacgg | ccttccttcc  | agttacttga  | atttgaaata  |
| 2881 | aaaaagcttt  | gccgctttgc  | tatcaagtat  | aaatagacct  | gcaattatta  | atcttttgtt  |
| 2941 | tcctcgtcat  | tgttctcggt  | ccctttcttc  | cttgtttctt  | tttctgcaca  | atatttcaag  |
| 3001 | ctataccaag  | catacaatca  | actccaagct  | tatgcccagg  | aagaagcgga  | aggtctcgag  |
| 3061 | cggcgccaat  | tttaatacaa  | gtgggaatat  | tgctgatagc  | tcaattgtcct | tcactttcac  |
| 3121 | taacagtagc  | aacggtccga  | acctcaaac   | aaactcaaca  | aattctcaag  | cgctttcaca  |
| 3181 | accaattgcc  | tcctctaacg  | ttcatgataa  | cttcatgaat  | aatgaaatca  | cggctagtaa  |
| 3241 | aattgatgat  | ggtaataaatt | caaaaccact  | gtcacctggt  | tggacggacc  | aaactgcgta  |
| 3301 | taacgcggtt  | ggaatcacta  | cagggatggt  | taataccact  | acaatggatg  | atgtATATA   |
| 3361 | CTACTTATTC  | GATGATGAAG  | ATACCCACCC  | AAACCCAAAA  | AAAGAGGGTG  | GGTCGAATA   |
| 3421 | AACAAGTTTG  | TACAAAAAAG  | CTGAACGAGA  | AACGTAATAA  | GATATAAATA  | TCAATATATT  |
| 3481 | AAATTAGATT  | TTGCATAAAA  | AACAGACTAC  | ATAATACTGT  | AAAACACAAC  | ATATCCAGTC  |
| 3541 | ACTATGGCGG  | CCGCGGGTGA  | TGCTGCCAAC  | TTAGCGGCCG  | CTAAGTTGGC  | AGCATCACCC  |
| 3601 | GACGCACTTT  | GCGCCGAATA  | AATACCTGTG  | ACGGAAGATC  | ACTTCGCAGA  | ATAAATAAAT  |
| 3661 | CCTGGTGTCC  | CTGTTGATAC  | CGGGAAGCCC  | TGGgCCAAC   | TTTGGCGAAA  | ATGAGACGTT  |
| 3721 | GATCGGCACG  | TAAGAGGTTT  | CAACTTTCAC  | CATAATGAAA  | TAAGATCACT  | ACCGGGCGTA  |
| 3781 | TTTTTTGAGT  | CATCGAGATT  | TTCAGGAGCT  | AAGGAAGCTA  | AAATGGAGAA  | AAAAATCACT  |
| 3841 | GGATATACCA  | CCGTTGATAT  | ATCCCAATGG  | CATCGTAAAG  | AACATTTTGA  | GGCATTTCAG  |
| 3901 | TCAGTTGCTC  | AATGTACCTA  | TAACCAGACC  | GTTACAGCTG  | ATATTACGGC  | CTTTTTAAAG  |
| 3961 | ACCGTAAAGA  | AAAATAAGCA  | CAAGTTTAT   | CCGGCCTTTA  | TTCACATTCT  | TGCCCGCCTG  |
| 4021 | ATGAATGCTC  | ATCCGGAATT  | CCGTATGGCA  | ATGAAAGACG  | GTGAGCTGGT  | GATATGGGAT  |
| 4081 | AGTGTTCACC  | CTTGTACAC   | CGTTTCCAT   | GAGCAAAC    | AAACGTTTTT  | ATCGTCTGG   |
| 4141 | AGTGAATACC  | ACGACGATTT  | CCGGCAGTTT  | CTACACATAT  | ATTCGCAAGA  | TGTGGCGTGT  |
| 4201 | TACGGTGAAA  | ACCTGGCCTA  | TTTCCCTAAA  | GGGTTTATTG  | AGAATATGTT  | TTTCGTCTCA  |
| 4261 | GCCAAATCCCT | GGGTGAGTTT  | CACCAGTTTT  | GATTTAAACG  | TGGCCAATAT  | GGACAACCTC  |
| 4321 | TTCCGCCCCG  | TTTTCAACAT  | GGGCAAATAT  | TATACGCAAG  | GCGACAAGGT  | GCTGATCCCG  |
| 4381 | CTGGCGATTG  | AGGTTTCATCA | TGCCGTTTGT  | GATGGCTTCC  | ATGTCGGCAG  | AATGCTTAAT  |
| 4441 | GAATTACAAC  | AGTACTGCGA  | TGAGTGGCAG  | GCGGGGCGTA  | ATCTAGAGGA  | TCCGGCTTAC  |
| 4501 | TAAAAGCCAG  | ATAACAGTAT  | GCGTATTTGC  | GCGCTGATTT  | TTGCGGTATA  | AGAATATATA  |
| 4561 | CTGATATGTA  | TACCGAAGT   | ATGTCAAAAA  | GAGGTATGCT  | ATGAAGCAGC  | GTATTACAGT  |
| 4621 | GACAGTTGAC  | AGCGACAGCT  | ATCAGTTGCT  | CAAGGCATAT  | ATGATGTCAA  | TATCTCCGGT  |
| 4681 | CTGGTAAAGCA | CAACCATGCA  | GAATGAAGCC  | CGTCGTCTGC  | GTGCCGAACG  | CTGGAAAGCG  |
| 4741 | GAAAATCAGG  | AAGGGATGGC  | TGAGGTGCGC  | CGGTTTATTG  | AAATGAACGG  | CTCTTTTGCT  |
| 4801 | GACGAGAACA  | GGGGCTGGTG  | AAATGCAAGT  | TAAGGTTTAC  | ACCTATAAAA  | GAGAGAGCCG  |
| 4861 | TTATCGTCTG  | TTTGTGGATG  | TACAGAGTGA  | TATTATTGAC  | ACGCCCGGGC  | GACGGATGGT  |



4921 GATCCCCCTG GCCAGTGCAC GTCTGCTGTC AGATAAAGTC CCCCCTGAAC TTTACCCGGT  
4981 GGTGCATATC GGGGATGAAA GCTGGCGCAT GATGACCACC GATATGGCCA GTGTGCCGGT  
5041 CTCCGTTATC GGGGAAGAAG TGGCTGATCT CAGCCACCGC GAAAATGACA TCAAAAACGC  
5101 CATTAACTTG ATGTTCTGGG GAATATAAAT GTCAGGCTCC CTTATACACA GCCAGTCTGC  
5161 AGGTCGACCA TAGTGACTGG ATATGTTGTG TTTTACAGTA TTATGTAGTC TGTTTTTTAT  
5221 GCAAAATCTA ATTTAATATA TTGATATTTA TATCATTTTA CGTTTCTCGT TCAGCTTTCT  
5281 TGTACAAAGT GGTTTGATGG CCGCTAAGTA AGTAAGACGT CGAGCTCTAA GTAAGTAACG  
5341 GCCGCCACCG CGGTGGAGCT TTGGACTTCT TCGCCAGAGG TTTGGTCAAG TCTCCAATCA  
5401 AGGTTGTCGG CTTGTCTACC TTGCCAGAAA TTTACGAAAA GATGGAAAAG GGTCAAATCG  
5461 TTGGTAGATA CGTTGTTGAC ACTTCTAAAT AAGCGAATTT CTTATGATTT ATGATTTTTA  
5521 TTATTAATA AGTTATAAAA AAAATAAGTG TATACAAATT TAAAGTGAC TCTTAGGTTT  
5581 TAAAAAGAAA ATTCTTgttc ttgagtaact ctttcctgta ggtcagggtg ctttctcagg  
5641 tatagcatga ggtcgcctctt attgaccaca cctctaccgg catgccgagc aaatgcctgc  
5701 aaatcgctcc ccatttcacc caattgtaga tatgctaact ccagcaatga gttgatgaat  
5761 ctcggtgtgt attttatgtc ctcagaggac aatacctgtt gtaactcgtt tctcacacgg  
5821 atcccaattc gccctatagt gagtcgtatt acaattcact ggccgtcgtt ttacaacgct  
5881 gtgactggga aaaccctggc gttaccaaac ttaatcgctt tgcagcacat cccctttcgg  
5941 ccagctggcg taatagcgaa gaggcccgcg ccgatcgccc tcccaacagg ttgvcgagcc  
6001 tgaatggcga atggacgcgc cctgtagcgg cgcattaagc gcggcgggtg tgggtggttac  
6061 gcgcagcgtg accgctacac ttgcccagcgc cctagcggcc gctcctttcc ctttcttccc  
6121 ttcccttctc gccacgttcg ccggctttcc ccgtcaagct ctaaatcggg ggctcccttt  
6181 aggtttccga tttagtgcct tacggcacct cgacccccaaa aaacttgatt aggggtgatg  
6241 ttccagtagt gggccatcgc cctgatagac ggtttttcgc cttttgacgt tggagtcac  
6301 gttctttaat agtggactgc tgttccaaac tgggaacaaca ctcaacccta tctcggctc  
6361 ttcttttgat ttataagggg ttttgccgat ttcggcctat tgggtaaaaa atgagctgat  
6421 ttaacaaaaa tttaacgcga attttaacaa aatattaacg tttacaattt cctgatcggg  
6481 tttttctcc ttacgcattc aataacctat tcacaccgca ggcaagtgca caaacaatc  
6541 ttaaaataat actactcagt aataacctat ttcttagcat ttttgacgaa atttgctatt  
6601 ttgttagagt cttttacacc atttgtctcc acacctccgc ttacatcaac accaataacg  
6661 ccatttaate taagcgcac accaacattt tctggcgta gtcaccagc taacataaaa  
6721 tttaagcttt cgggctctc ttgccttcca acccagtcag aaatcgagtt ccaatccaaa  
6781 agttcacctg tcccacctgc ttctgaatca aacaagggaa taaacgaatg aggtttctgt  
6841 gaagctgcac tgagttagt gttgcagtct tttggaaata cgagctcttt aataactggc  
6901 aaaccgagga actcctggta ttcttgccc gactcatctc catgcagttg gacgatatca  
6961 atgcccgaat cattgaccag agccaaaaca tctctcttag gttgattacg aaacacgcca  
7021 accaagtatt tccgagtgcc tgaactattt ttatatgctt ttacaagact tgaatttttc  
7081 cttgcaataa ccgggtcaat tgttctcttt ctattgggca cacatataat acccagcaag  
7141 tcagcatcgg aatctagagc acattctcgg gctctgtgct tctgcaagcc gcaaaccttc  
7201 accaatggac cagaactacc tgtgaaatta ataacagaca ataacagcc tactccaagc  
7261 tgcttaatca cgtatactca cgtgctcaat agtcaccaat gccctccctc ttggccctct  
7321 ccttttcttt tttcgaccga attaatcttt aatcggcaaa aaaagaaaag ctccggatca  
7381 agattgtacg taagtgaca agctatTTTT caataaagaa tatcttccac tactgcctac  
7441 tggcgtcata actgcaaagt acacatataat tacgatgctg tctattaaat gcttccata  
7501 ttatatatat agtaatgtcg tttatggtgc actctcagta caatctgctc tgatgccgca  
7561 tagttaagcc agcccagaca cccgccaaca cccgctgacg cgccctgacg ggcttgtctg  
7621 ctcccggcat ccgcttacag acaagctgtg accgtctccg ggagctgcat gtgtcagagg  
7681 ttttcacogt catcacgaa acgcgcgaga cgaaggggct cgtgatagc cctattttg  
7741 taggttaatg tcatgataat aatggtttct taggacggat cgcttgccctg taacttacac  
7801 ggcctctgta tcttttaatg atggaataat ttgggaatth actctgtggt tattttatth  
7861 tatgttttgt atttggatth tagaaagtaa ataaagaagg tagaagagtt acggaatgaa  
7921 gaaaaaaaaa ttaaaaaaag tttaaaaaat ttcaacaaaa agcgtactth acatataat  
7981 ttattagaca agaaaagcag attaaataga tatacattcg attaacgata agtaaaatgt  
8041 aaaatcacag gatthtctgt tgtggtcttc tacacagaca agatgaaaca attcggcatt  
8101 aatacctgag agcaggaaga gcaagataaa aggtagatth tgttggcgat ccccctagag  
8161 tcttttacat cttcggaaaa caaaaactat ttttcttth atttcttth ttactttcta  
8221 ttttaattth atataattth attaaaaaat ttaaattata attatttth tagcacgtga  
8281 tgaaaaggac ccaggtggca ctttctgggg aaatgtgcgc ggaaccctta tttgtttatt  
8341 tttctaaata cattcaaata tgtatccgct catgagacaa taaccctgat aaatgcttca  
8401 ataataatga aaaaggaaga gtaatgagat tcaacattth cgtgtcgccc ttattccctt  
8461 ttttgcggca ttttgccttc ctgttttttg caccacagaa acgctgggtg aagtaaaaga  
8521 tgctgaagat cagttgggtg cacgagtggt ttacatcgaa ctggatctca acagcggtaa  
8581 gatccttgag agttttcgcc ccgaagaacg ttttccaatg atgagcactt ttaaagttct  
8641 gctatgtggc gcggtattat cccgtattga cgcggggcaa gagcaactcg gtcgcccgat  
8701 acactattct cagaatgact tggttgagta ctaccagtc acagaaaagc atcttacgga  
8761 tggcatgaca gtaagagaat tatgcagtgc tgccataacc atgagtgata acactgaggc  
8821 caacttactt ctgacaacga tccggaggacc gaaggagcta accgctttth ttcacaacat  
8881 gggggatcat gtaactcgcc ttgatcgttg ggaaccggag ctgaaatgaa ccatacaaa  
8941 cgacgagcgt gacaccacga tgcctgtagc aatggcaaca acggtgcgca aactattaac  
9001 tggcgaacta cttactctag cttcccggca acaattaata gactggatgg agggcgataa  
9061 agttgcagga ccacttctgc gctcggccct tccggctggc tgggtttatg ctgataaatc  
9121 tggagccggt gagcgtgggt ctccgctgat cattgcagca ctggggccag atggtgagcc  
9181 ctcccgtatc gtagttatct acacgacggg cagtcaggca actatggatg aacgaaatag

9241 acagatcgct gagataggtg cctcactgat taagcattgg taactgtcag accaagttaa  
9301 ctcatatata ctttagattg atttaaaact tcatttttaa tttaaaagga tctaggtgaa  
9361 gatccttttt gataatctca tgaccaaaat cccttaacgt gagttttcgt tccactgagc  
9421 gtcagacccc gtagaaaaga tcaaaggatc ttcttgagat cttttttttc tgcgcgtaat  
9481 ctgctgcttg caaacaaaaa aaccaccgct accagcgggtg gtttgtttgc cggatcaaga  
9541 gctaccaact ctttttccga aggtaactgg cttcagcaga gcgcagatac caaatactgt  
9601 ccttctagtg tagccgtagt taggccacca cttcaagaac tctgtagcac cgcctacata  
9661 cctcgctctg ctaatcctgt taccagtggc tgctgccagt ggcgataagt cgtgtcttac  
9721 cgggttggac tcaagacgat agttaccgga taaggcgcag cggtcgggct gaacgggggg  
9781 ttcgtgcaca cagcccagct tggagcgaac gacctacacc gaactgagat acctacagcg  
9841 tgagcattga gaaagcgcca cgcttcccga agggagaaaag gcggacaggt atccggtag  
9901 cggcagggtc ggaacaggag agcgcacgag ggagcttcca ggggggaacg cctggtatct  
9961 ttatagtctt gtcgggtttc gccacctctg acttgagcgt cgatttttgt gatgctcgtc  
10021 aggggggccg agcctatgga aaaacgccag caacgcggcc tttttacggt tccctggcctt  
10081 ttgctggcct tttgctcaca tgttctttcc tgcgttatcc cctgattctg tggataaccg  
10141 tattaccgcc tttgagtggg ctgataaccgc tcgccgcagc cgaacgaccg agcgcagcga  
10201 gtcagtgagc gaggaagcgg aagagcgccc aatacgcaaa ccGCCTCTCC CCGCGCGTTG  
10261 GCCGATTCAT TAATGCAGCT GGCACGACAG GTTCCCACAG TGGAAAGCGG GCAGTGAGCG  
10321 CAACGCAATT AATGTGAGTT AGTCACTCA TTAGGCACCC CAGGCTTTAC ACTTTATGCT  
10381 TCCGGCTCGT ATGTTGTGTG GAATTGTG

//

## REFERENCES

1. Braun, P. *et al. Nat. Methods* 6, 91-97 (2009).
2. Dreze, M. *et al. Methods Enzymol* 470, 281-315 (2010).
3. Yu, H. *et al. Science* 322, 104-110 (2008).
4. Rual, J. F. *et al. Nature* 437, 1173-1178 (2005).
5. Venkatesan, K. *et al. Nat. Methods* 6, 83-90 (2009).
6. Boxem, M. *et al. Cell* 134, 534-545 (2008).
7. Simonis, N. *et al. Nat. Methods* 6, 47-54 (2009).
8. Dreze, M. *et al. Nat Methods* 6, 843-849 (2009).
9. Zhong, Q. *et al. Mol Syst Biol* 5, 321 (2009).
